# Supplementary material for: Design and synthesis of novel chloropyridazine hybrids as promising anticancer agents acting by apoptosis induction and PARP-1 inhibition through a molecular hybridization strategy
Source: Royal Society of Chemistry journal article supplement (doi:10.1039/d3md00751k), 2024-01-01
Supplement: d3md00751k1.pdf [file d3md00751k1.pdf]

Supplementary Data

**Design and Synthesis of Novel Chloropyridazine Hybrids as Promising Anticancer Agents Acting by Apoptosis Induction and PARP-1 Inhibition Through Molecular Hybridization Strategy**

Norhan A. Abdelrahman<sup>1,†</sup>, Ahmed A. Al-Karmalawy<sup>2,3,†,\*</sup>, Maiy Y. Jaballah<sup>1</sup>, Galal Yahya<sup>4,5</sup>, Marwa Sharaky<sup>6</sup>, Khaled A. M. Abouzid<sup>1,\*</sup>

<sup>1</sup> Department of Pharmaceutical Chemistry, Faculty of Pharmacy, Ain-Shams University, Cairo 11566, Egypt.

<sup>2</sup> Department of Pharmaceutical Chemistry, Faculty of Pharmacy, Horus University-Egypt, New Damietta 34518, Egypt.

<sup>3</sup> Department of Pharmaceutical Chemistry, Faculty of Pharmacy, Ahram Canadian University, 6th of October City, Giza 12566, Egypt.

<sup>4</sup> Department of Microbiology and Immunology, Zagazig University, Zagazig 44519, Egypt.

<sup>5</sup> Molecular Biology Institute of Barcelona, Spanish National Research Council, Catalonia, Spain.

<sup>6</sup> Cancer Biology Department, Pharmacology Unit, National Cancer Institute (NCI), Cairo University, Cairo, Egypt.

\*Correspondence:

**Ahmed A. Al-Karmalawy**; Email: [akarmalawy@horus.edu.eg](mailto:akarmalawy@horus.edu.eg)

**Khaled A. M. Abouzid**; Email: [khaled.abouzid@pharma.asu.edu.eg](mailto:khaled.abouzid@pharma.asu.edu.eg)

†: Equal contribution.

## Table of Contents

| Title                                                                                                            | Page      |
|------------------------------------------------------------------------------------------------------------------|-----------|
| <b>Yields and elemental analysis</b>                                                                             | <b>S4</b> |
| Table S1. Yields and elemental analysis of target compounds (3a-h, 4a-e, and 5)                                  | S4        |
| Figure S1. Elemental analysis of target compounds (3a-h, 4a-e, and 5)                                            | S5        |
| <b><sup>1</sup>H NMR, <sup>13</sup>C NMR, and Mass spectral data of the target compounds (3a-h, 4a-e, and 5)</b> | <b>S6</b> |
| Figure S2. <sup>1</sup> H NMR (400 MHz, DMSO- <i>d</i> <sub>6</sub> ) spectrum of compound 3a                    | S6        |
| Figure S3. <sup>13</sup> C NMR (100 MHz, DMSO- <i>d</i> <sub>6</sub> ) spectrum of compound 3a                   | S7        |
| Figure S4. Mass spectrum of compound 3a                                                                          | S7        |
| Figure S5. <sup>1</sup> H NMR (400 MHz, DMSO- <i>d</i> <sub>6</sub> ) spectrum of compound 3b                    | S8        |
| Figure S6. <sup>13</sup> C NMR (100 MHz, DMSO- <i>d</i> <sub>6</sub> ) spectrum of compound 3b                   | S9        |
| Figure S7. Mass spectrum of compound 3b                                                                          | S9        |
| Figure S8. <sup>1</sup> H NMR (400 MHz, DMSO- <i>d</i> <sub>6</sub> ) spectrum of compound 3c                    | S10       |
| Figure S9. <sup>13</sup> C NMR (100 MHz, DMSO- <i>d</i> <sub>6</sub> ) spectrum of compound 3c                   | S11       |
| Figure S10. Mass spectrum of compound 3c                                                                         | S11       |
| Figure S11. <sup>1</sup> H NMR (400 MHz, DMSO- <i>d</i> <sub>6</sub> ) spectrum of compound 3d                   | S12       |
| Figure S12. <sup>13</sup> C NMR (100 MHz, DMSO- <i>d</i> <sub>6</sub> ) spectrum of compound 3d                  | S13       |
| Figure S13. Mass spectrum of compound 3d                                                                         | S13       |
| Figure S14. <sup>1</sup> H NMR (400 MHz, DMSO- <i>d</i> <sub>6</sub> ) spectrum of compound 3e                   | S14       |
| Figure S15. <sup>13</sup> C NMR (100 MHz, DMSO- <i>d</i> <sub>6</sub> ) spectrum of compound 3e                  | S15       |
| Figure S16. Mass spectrum of compound 3e                                                                         | S15       |
| Figure S17. <sup>1</sup> H NMR (400 MHz, DMSO- <i>d</i> <sub>6</sub> ) spectrum of compound 3f                   | S16       |
| Figure S18. <sup>13</sup> C NMR (100 MHz, DMSO- <i>d</i> <sub>6</sub> ) spectrum of compound 3f                  | S17       |
| Figure S19. Mass spectrum of compound 3f                                                                         | S17       |
| Figure S20. <sup>1</sup> H NMR (400 MHz, DMSO- <i>d</i> <sub>6</sub> ) spectrum of compound 3g                   | S18       |
| Figure S21. <sup>13</sup> C NMR (100 MHz, DMSO- <i>d</i> <sub>6</sub> ) spectrum of compound 3g                  | S19       |
| Figure S22. Mass spectrum of compound 3g                                                                         | S19       |
| Figure S23. <sup>1</sup> H NMR (400 MHz, DMSO- <i>d</i> <sub>6</sub> ) spectrum of compound 3h                   | S20       |
| Figure S24. <sup>13</sup> C NMR (100 MHz, DMSO- <i>d</i> <sub>6</sub> ) spectrum of compound 3h                  | S21       |
| Figure S25. Mass spectrum of compound 3h                                                                         | S21       |
| Figure S26. <sup>1</sup> H NMR (400 MHz, DMSO- <i>d</i> <sub>6</sub> ) spectrum of compound 4a                   | S22       |
| Figure S27. <sup>13</sup> C NMR (100 MHz, DMSO- <i>d</i> <sub>6</sub> ) spectrum of compound 4a                  | S23       |
| Figure S28. Mass spectrum of compound 4a                                                                         | S23       |
| Figure S29. <sup>1</sup> H NMR (400 MHz, DMSO- <i>d</i> <sub>6</sub> ) spectrum of compound 4b                   | S24       |
| Figure S30. <sup>13</sup> C NMR (100 MHz, DMSO- <i>d</i> <sub>6</sub> ) spectrum of compound 4b                  | S25       |
| Figure S31. Mass spectrum of compound 4b                                                                         | S25       |
| Figure S32. <sup>1</sup> H NMR (400 MHz, DMSO- <i>d</i> <sub>6</sub> ) spectrum of compound 4c                   | S26       |
| Figure S33. <sup>13</sup> C NMR (100 MHz, DMSO- <i>d</i> <sub>6</sub> ) spectrum of compound 4c                  | S27       |
| Figure S34. Mass spectrum of compound 4c                                                                         | S27       |
| Figure S35. <sup>1</sup> H NMR (400 MHz, DMSO- <i>d</i> <sub>6</sub> ) spectrum of compound 4d                   | S28       |
| Figure S36. <sup>13</sup> C NMR (100 MHz, DMSO- <i>d</i> <sub>6</sub> ) spectrum of compound 4d                  | S29       |
| Figure S37. Mass spectrum of compound 4d                                                                         | S29       |
| Figure S38. <sup>1</sup> H NMR (400 MHz, DMSO- <i>d</i> <sub>6</sub> ) spectrum of compound 4e                   | S30       |

## Supplementary Data

|                                                                                                                                                                                         |            |
|-----------------------------------------------------------------------------------------------------------------------------------------------------------------------------------------|------------|
| <b>Figure S39.</b> $^{13}\text{C}$ NMR (100 MHz, $\text{DMSO-}d_6$ ) spectrum of compound <b>4e</b>                                                                                     | <b>S31</b> |
| <b>Figure S40.</b> Mass spectrum of compound <b>4e</b>                                                                                                                                  | <b>S31</b> |
| <b>Figure S41.</b> $^1\text{H}$ NMR (400 MHz, $\text{DMSO-}d_6$ ) spectrum of compound <b>5</b>                                                                                         | <b>S32</b> |
| <b>Figure S42.</b> $^{13}\text{C}$ NMR (100 MHz, $\text{DMSO-}d_6$ ) spectrum of compound <b>5</b>                                                                                      | <b>S33</b> |
| <b>Figure S43.</b> Mass spectrum of compound <b>5</b>                                                                                                                                   | <b>S33</b> |
| <b>Biological data</b>                                                                                                                                                                  | <b>S34</b> |
| <b>Figure S44.</b> Repeated cell cycle analysis histograms of control, <b>3c</b> , and <b>4b</b> candidates in HNO97 cells.                                                             | <b>S34</b> |
| <b>Table S2.</b> $\text{IC}_{50}$ curves of the new 4-chloropyridazinoxypyphenyl hybrids ( <b>3a-h</b> , <b>4a-e</b> , and <b>5</b> ) against HNO97, FaDu, and MDA-MB-468 tested cells. | <b>S35</b> |
| <b>Materials and Methods</b>                                                                                                                                                            | <b>S40</b> |
| <b>SI1.</b> % Inhibition against human eleven cancer cell lines at 100 $\mu\text{g/mL}$                                                                                                 | <b>S40</b> |
| <b>SI2.</b> Cytotoxicity evaluation against HNO97, FaDu, and MDA-MB-468 cancer cell lines and normal HSF cell line                                                                      | <b>S40</b> |
| <b>SI3.</b> Apoptotic markers assay (Enzyme-linked Immunosorbent assay)                                                                                                                 | <b>S41</b> |
| <b>SI4.</b> Western blot assays                                                                                                                                                         | <b>S42</b> |
| <b>SI5.</b> Cell cycle analysis                                                                                                                                                         | <b>S43</b> |
| <b>References</b>                                                                                                                                                                       | <b>S43</b> |

**Yields and Elemental Analysis****Table S1.** Yields and elemental analysis of target compounds (**3a-h**, **4a-e**, and **5**).

| <b>Old Code</b> | <b>New Code</b> | <b>%Yield</b> | <b>C%</b> | <b>H%</b> | <b>N%</b> |
|-----------------|-----------------|---------------|-----------|-----------|-----------|
| NM1             | <b>3a</b>       | 40            | 67.98     | 4.05      | 8.59      |
| NM2             | <b>4a</b>       | 40            | 70.32     | 4.57      | 6.45      |
| NM3             | <b>3f</b>       | 40            | 64.78     | 3.85      | 8.12      |
| NM4             | <b>3c</b>       | 45            | 65.09     | 4.20      | 12.21     |
| NM5             | <b>3h</b>       | 40            | 60.04     | 3.39      | 11.28     |
| NM6             | <b>3g</b>       | 50            | 65.31     | 4.23      | 7.89      |
| NM7             | <b>3e</b>       | 50            | 62.84     | 4.37      | 11.28     |
| NM8             | <b>3d</b>       | 50            | 64.23     | 4.21      | 10.88     |
| NM9             | <b>5</b>        | 45            | 50.52     | 2.63      | 12.81     |
| NM10            | <b>3b</b>       | 45            | 68.70     | 4.45      | 8.15      |
| NM11            | <b>4b</b>       | 45            | 61.27     | 3.42      | 5.71      |
| NM12            | <b>4d</b>       | 50            | 61.74     | 3.59      | 5.49      |
| NM13            | <b>4c</b>       | 45            | 62.87     | 3.62      | 5.89      |
| NM14            | <b>4e</b>       | 40            | 68.79     | 4.61      | 6.18      |

## Supplementary Data



جامعة الأزهر  
Al-Azhar University  
المركز الإقليمي للفطريات وتطبيقاتها  
The Regional Center for Mycology and Biotechnology

**Requester Data:**

Name: Dr. Norhan Ahmed Abdelrhman

**Sample Data:**

Fourteen samples had been submitted for elemental analysis.

**Analysis Report:**

| Sample Code      | C%    | H%   | N%    |
|------------------|-------|------|-------|
| NM <sub>1</sub>  | 67.98 | 4.05 | 8.59  |
| NM <sub>2</sub>  | 70.32 | 4.57 | 6.45  |
| NM <sub>3</sub>  | 64.78 | 3.85 | 8.12  |
| NM <sub>4</sub>  | 65.09 | 4.20 | 12.21 |
| NM <sub>5</sub>  | 60.04 | 3.39 | 11.28 |
| NM <sub>6</sub>  | 65.31 | 4.23 | 7.89  |
| NM <sub>7</sub>  | 62.84 | 4.37 | 11.28 |
| NM <sub>8</sub>  | 64.23 | 4.21 | 10.88 |
| NM <sub>9</sub>  | 50.52 | 2.63 | 12.81 |
| NM <sub>10</sub> | 68.70 | 4.45 | 8.15  |
| NM <sub>11</sub> | 61.27 | 3.42 | 5.71  |
| NM <sub>12</sub> | 61.74 | 3.59 | 5.49  |
| NM <sub>13</sub> | 62.87 | 3.62 | 5.89  |
| NM <sub>14</sub> | 68.79 | 4.61 | 6.18  |

**INVESTIGATOR**



**DIRECTOR**



26.6.2023



تليفون : ٢٢١٩٠٢٧٢ (٠٢-٢) فاكس : ٢٢١٧٠٢٧٢ (٠٢-٢)

<http://www.azhar.edu.eg.htm>

[http://www.azhar.edu.eg/pages/fungi\\_center.htm](http://www.azhar.edu.eg/pages/fungi_center.htm)

Facebook : RCMBAZHAR

شمارع المطبع الدائم - مدينة نصر - القاهرة  
[rcmb@azhar.edu.eg](mailto:rcmb@azhar.edu.eg) : البريد الإلكتروني  
 الموقع الإلكتروني :  
 صندوق بريد ١١٩٨١ مدينة نصر القاهرة

**Figure S1.** Elemental analysis of target compounds (3a-h, 4a-e, and 5).

Supplementary Data

**$^1\text{H}$  NMR,  $^{13}\text{C}$  NMR, and Mass Spectra of Compounds (3a-h, 4a-e, and 5)**

***(E)*-3-(4-((6-Chloropyridazin-3-yl)oxy)phenyl)-1-phenylprop-2-en-1-one (3a)**

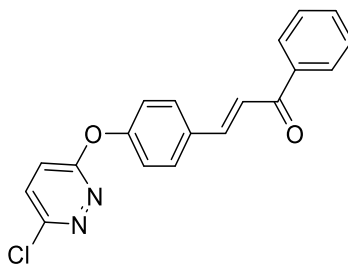

**3a**

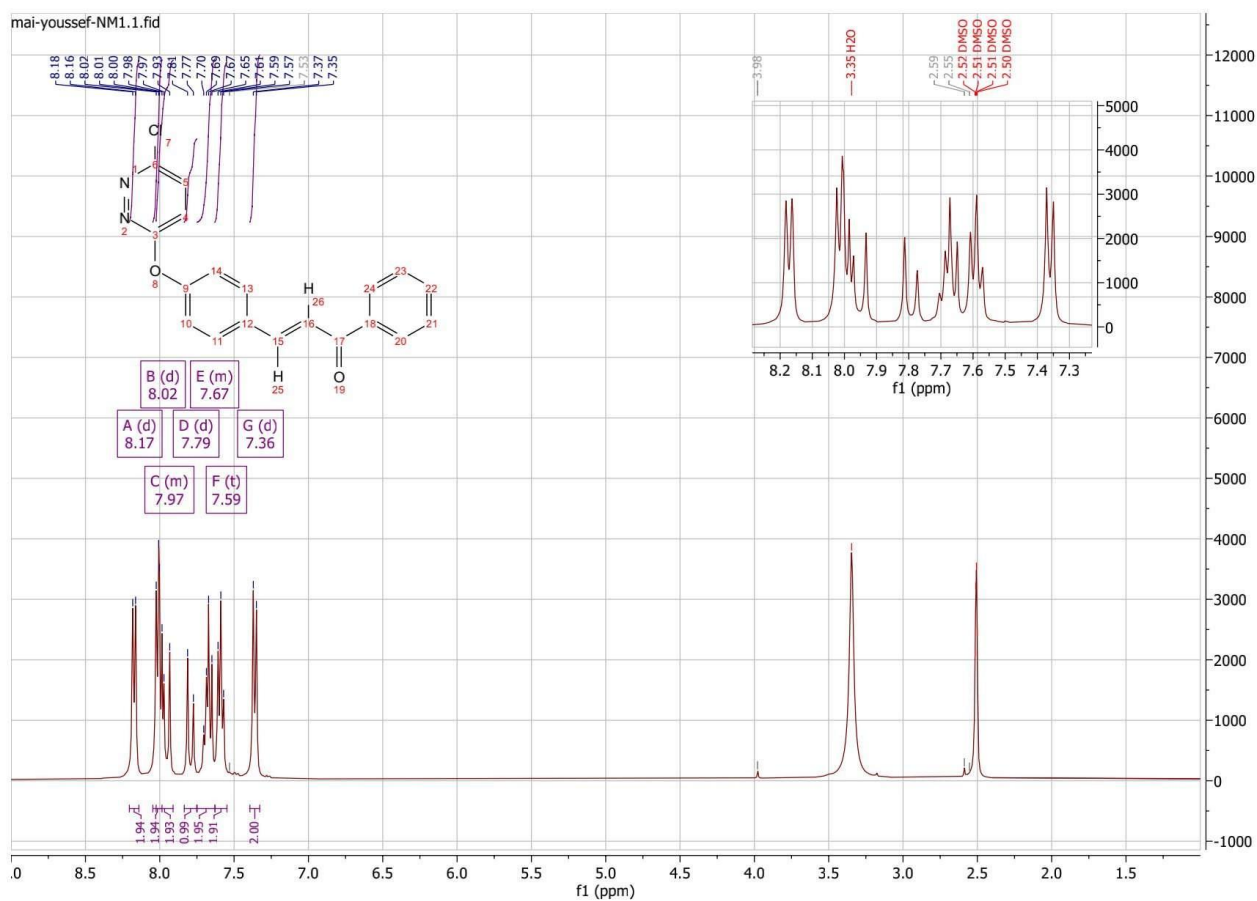

**Figure S2.**  $^1\text{H}$  NMR (400 MHz,  $\text{DMSO}-d_6$ ) spectrum of compound **3a**.

# Supplementary Data

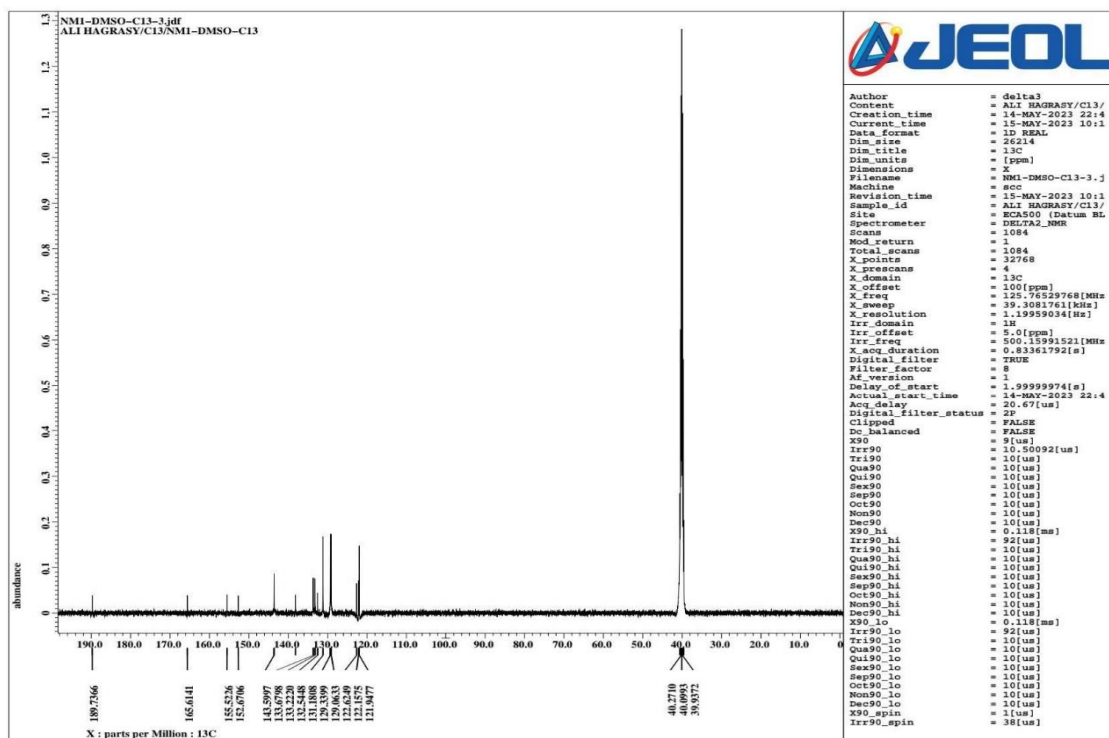

**Figure S3.** <sup>13</sup>C NMR (100 MHz, DMSO-*d*<sub>6</sub>) spectrum of compound **3a**.

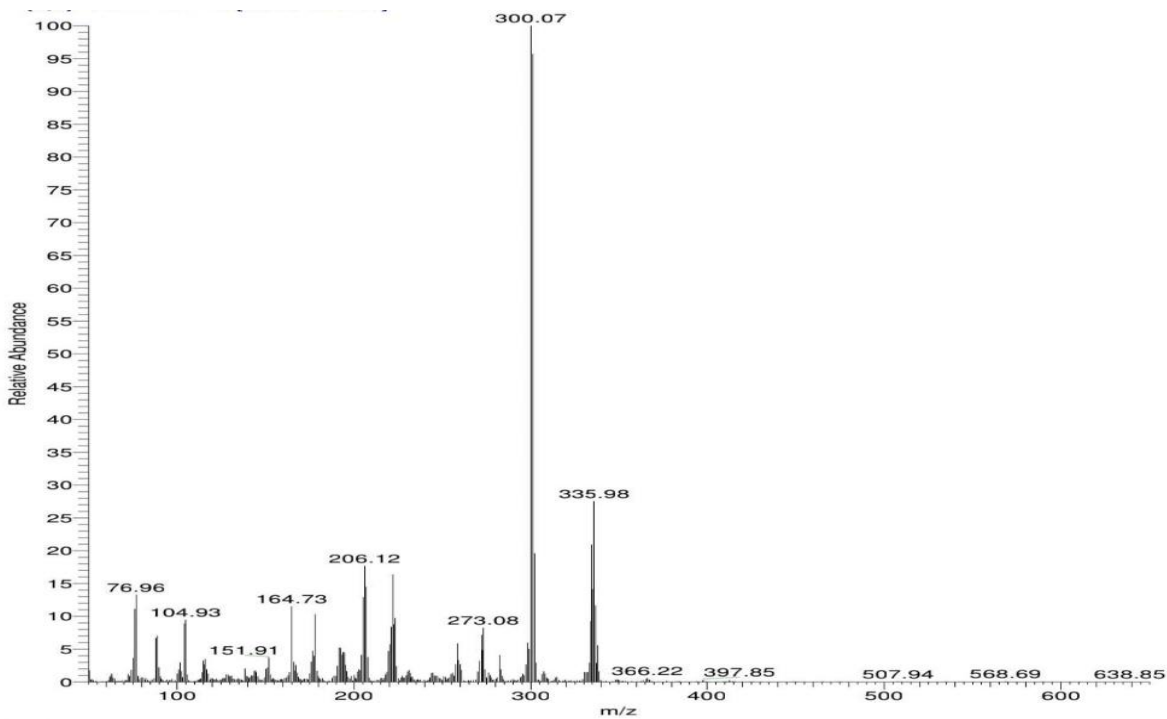

**Figure S4.** Mass spectrum of compound **3a**.

Supplementary Data

**(E)-3-(4-((6-Chloropyridazin-3-yl)oxy)phenyl)-1-(p-tolyl)prop-2-en-1-one (3b)**

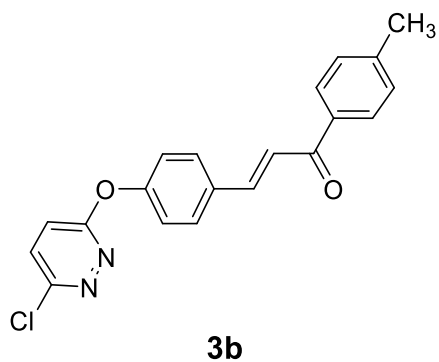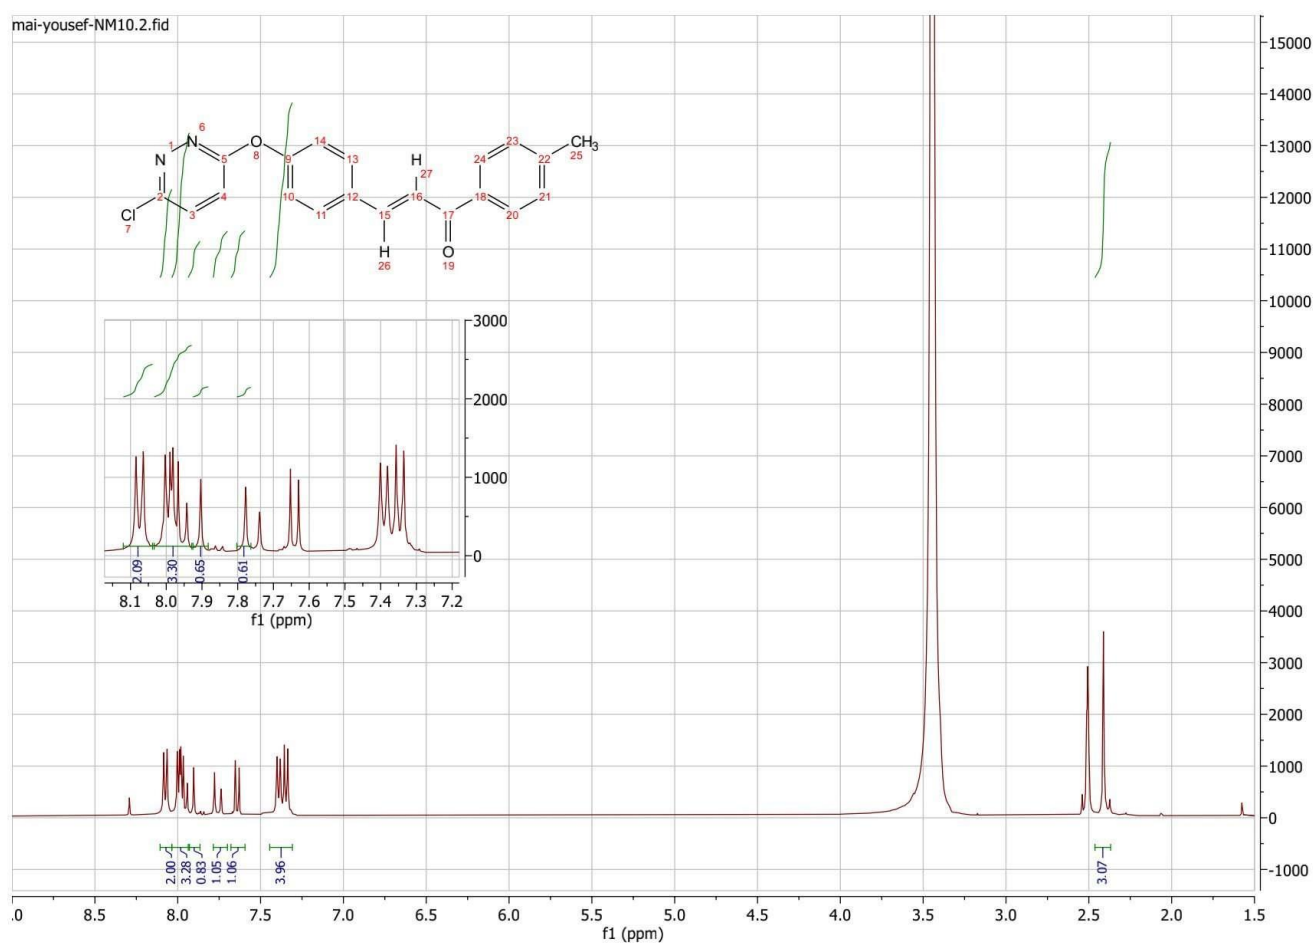

**Figure S5.**  $^1\text{H}$  NMR (400 MHz,  $\text{DMSO}-d_6$ ) spectrum of compound **3b**.



# Supplementary Data

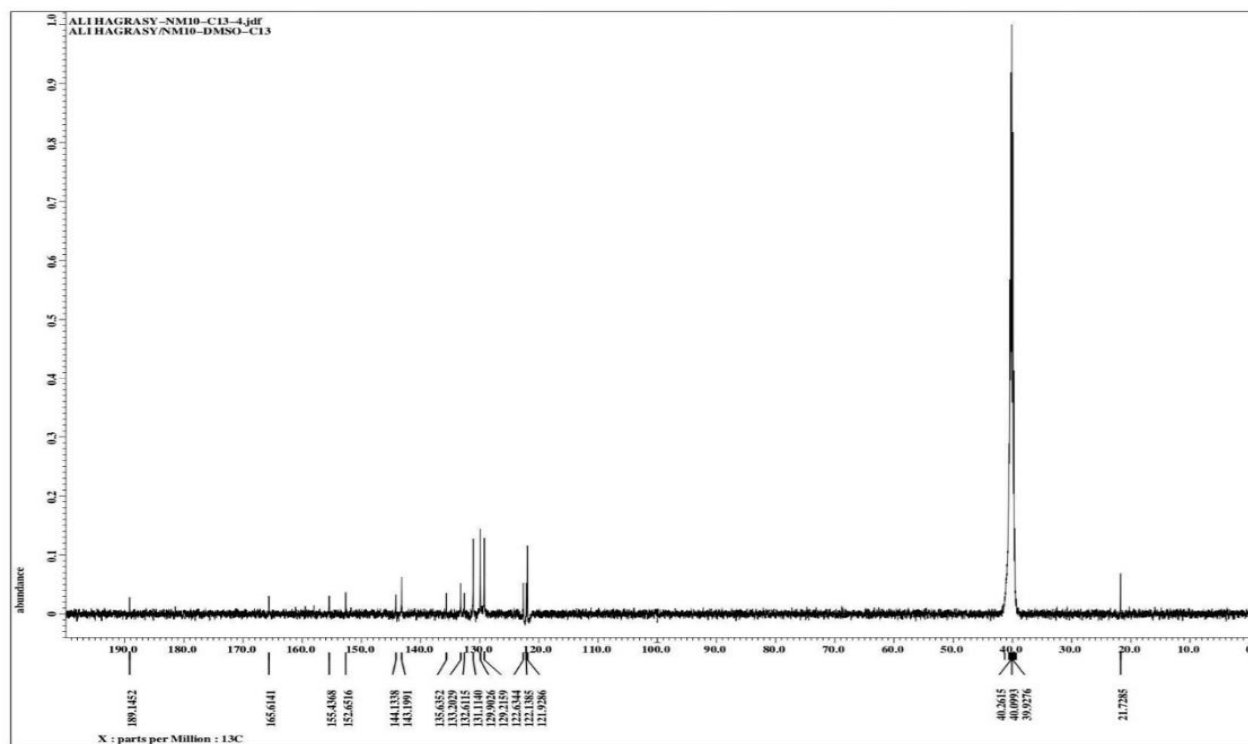

**Figure S6.**  $^{13}\text{C}$  NMR (100 MHz,  $\text{DMSO}-d_6$ ) spectrum of compound **3b**.

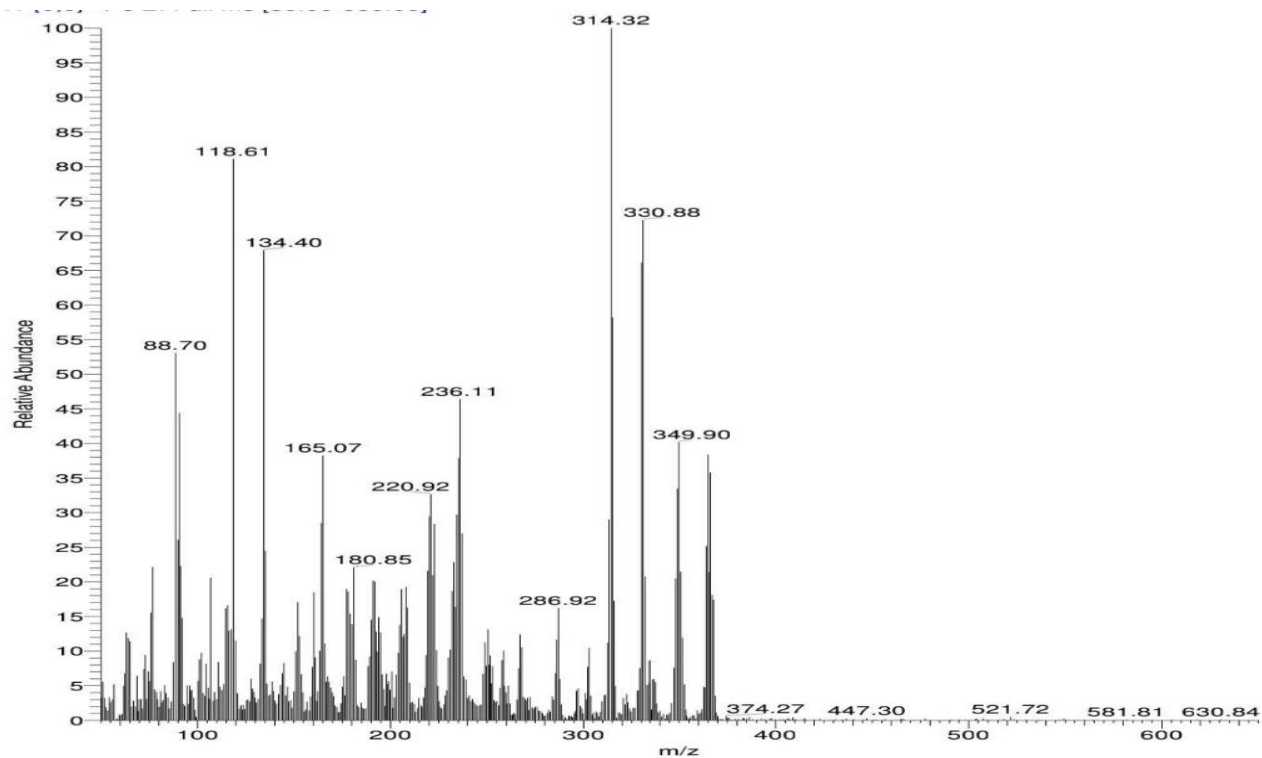

**Figure S7.** Mass spectrum of compound **3b**.

Supplementary Data

**(E)-1-(4-Aminophenyl)-3-(4-((6-chloropyridazin-3-yl)oxy)phenyl)prop-2-en-1-one (3c)**

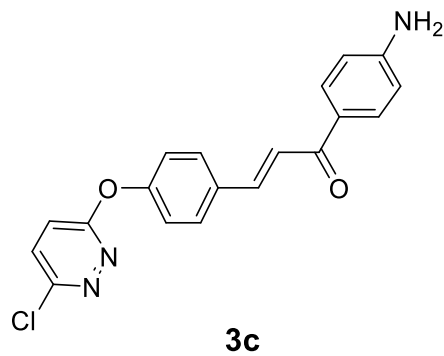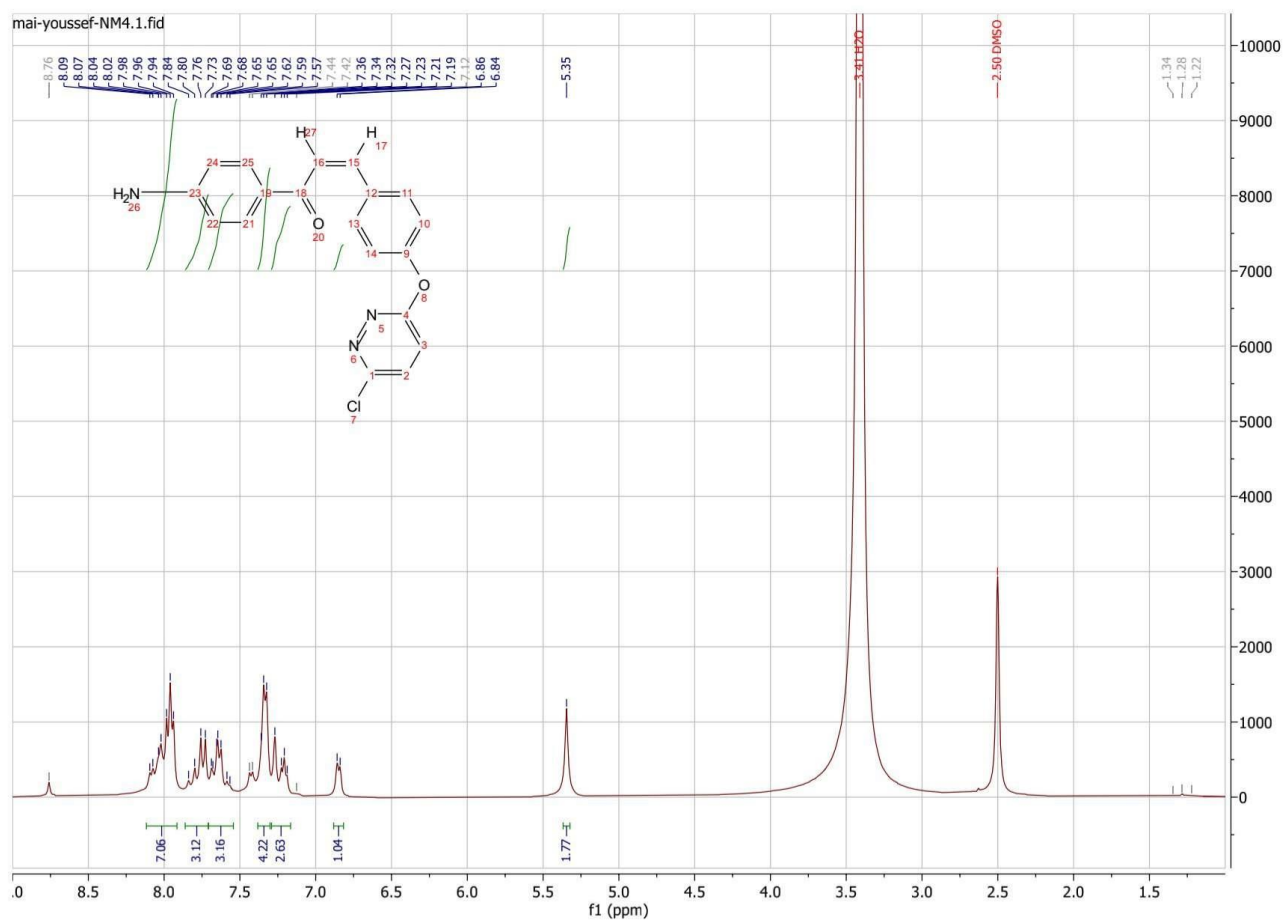

**Figure S8.** <sup>1</sup>H NMR (400 MHz, DMSO-*d*<sub>6</sub>) spectrum of compound **3c**.

# Supplementary Data

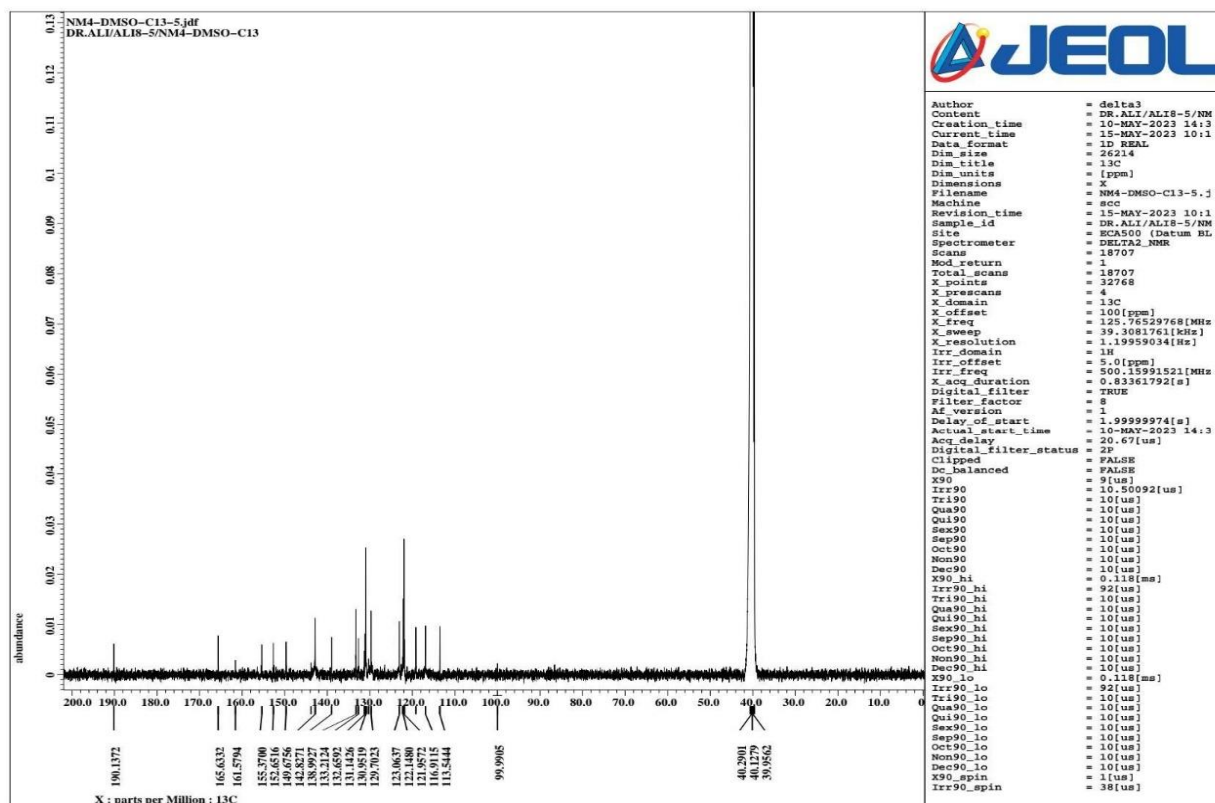

Figure S9.  $^{13}\text{C}$  NMR (100 MHz, DMSO- $d_6$ ) spectrum of compound 3c.

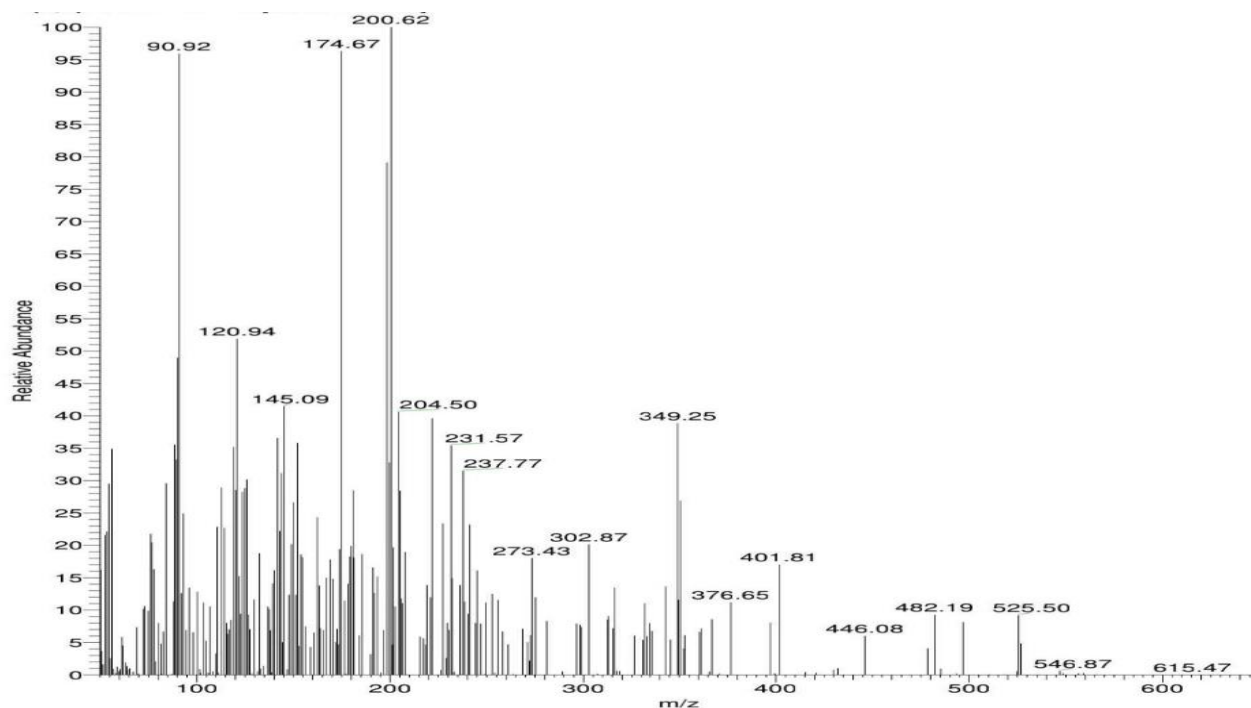

Figure S10. Mass spectrum of compound 3c.

Supplementary Data

*(E)*-3-(4-((6-Chloropyridazin-3-yl)oxy)phenyl)-1-(4-(acetamido)phenyl)prop-2-en-1-one (**3d**)

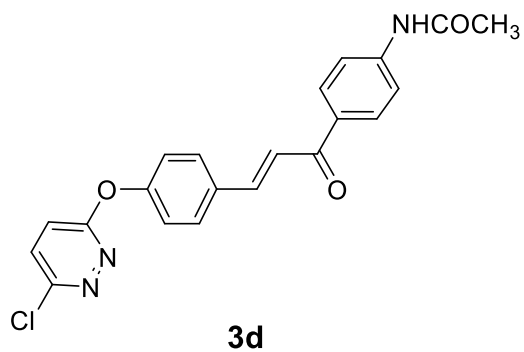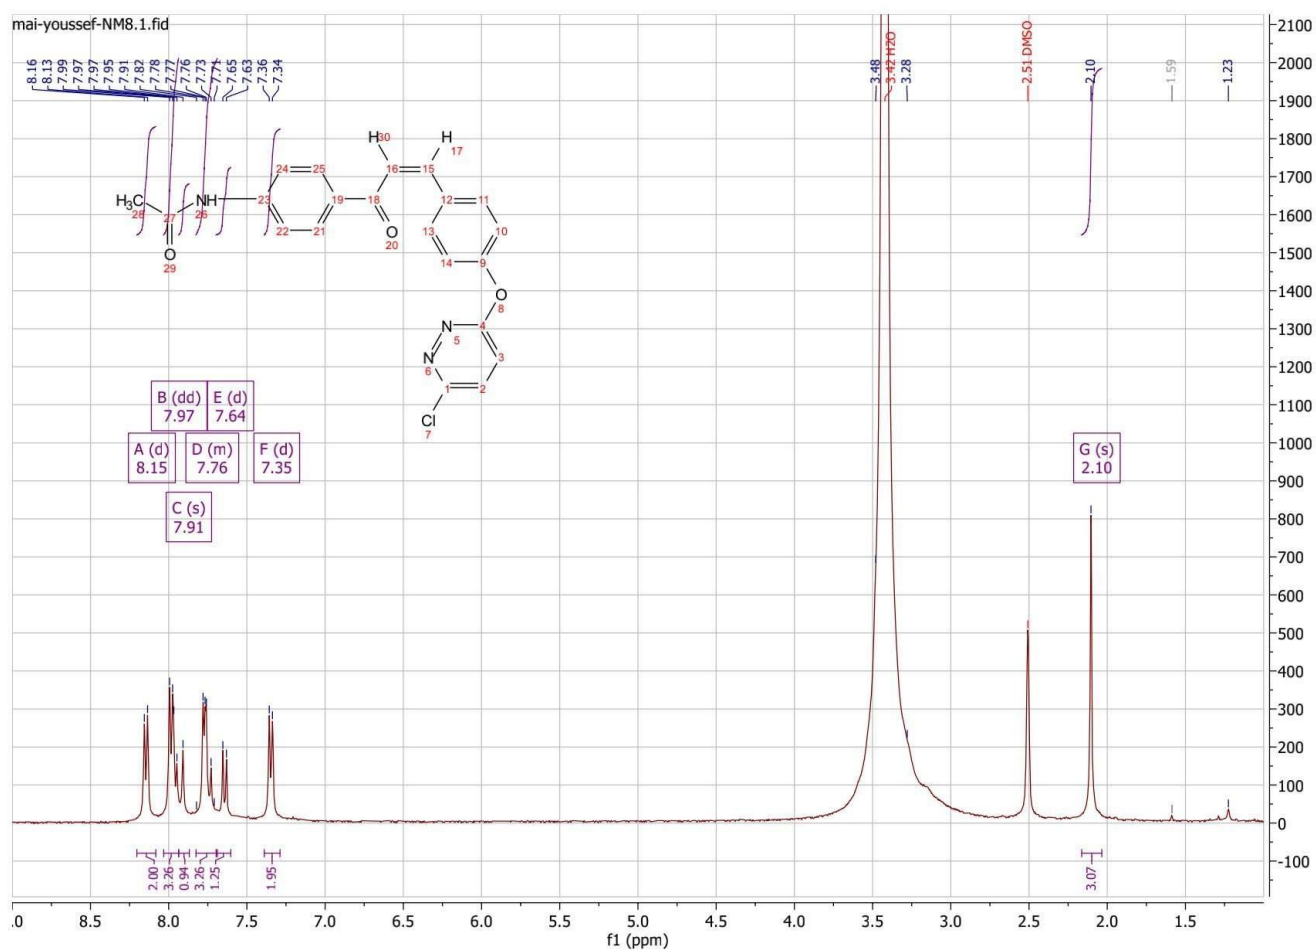

**Figure S11.**  $^1\text{H}$  NMR (400 MHz,  $\text{DMSO}-d_6$ ) spectrum of compound **3d**.

# Supplementary Data

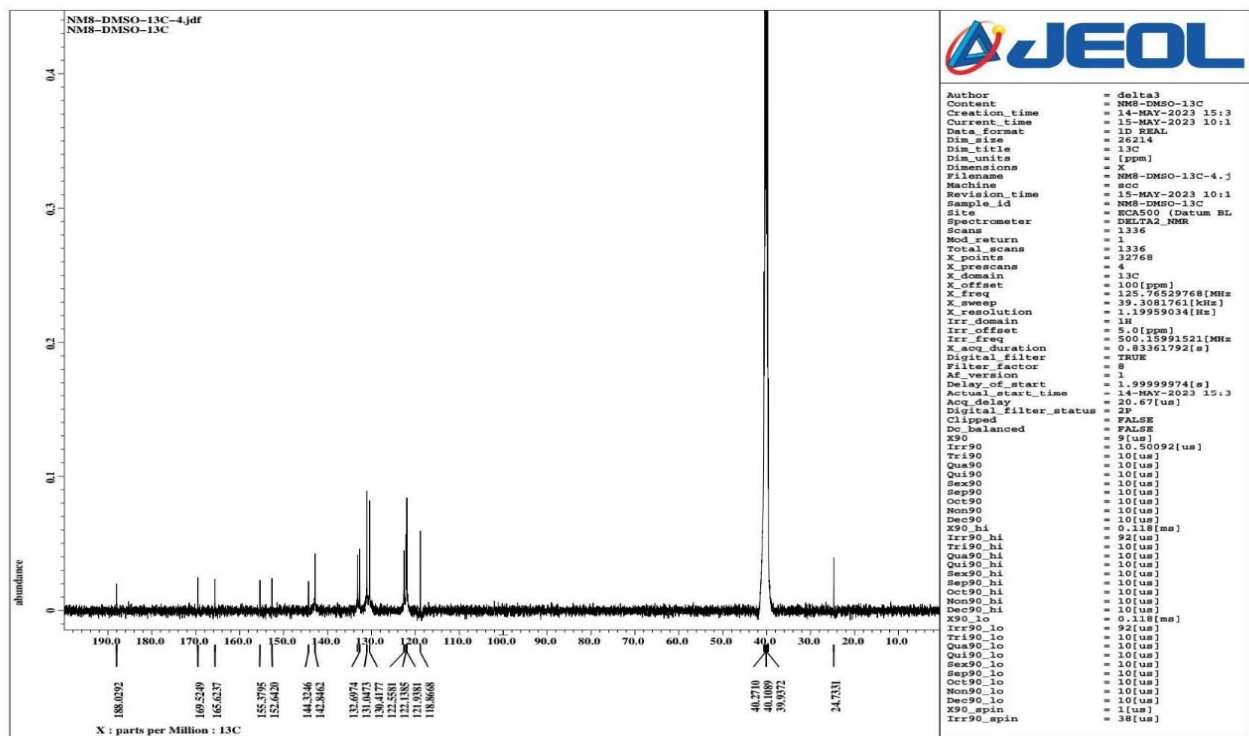

Figure S12.  $^{13}\text{C}$  NMR (100 MHz,  $\text{DMSO}-d_6$ ) spectrum of compound **3d**.

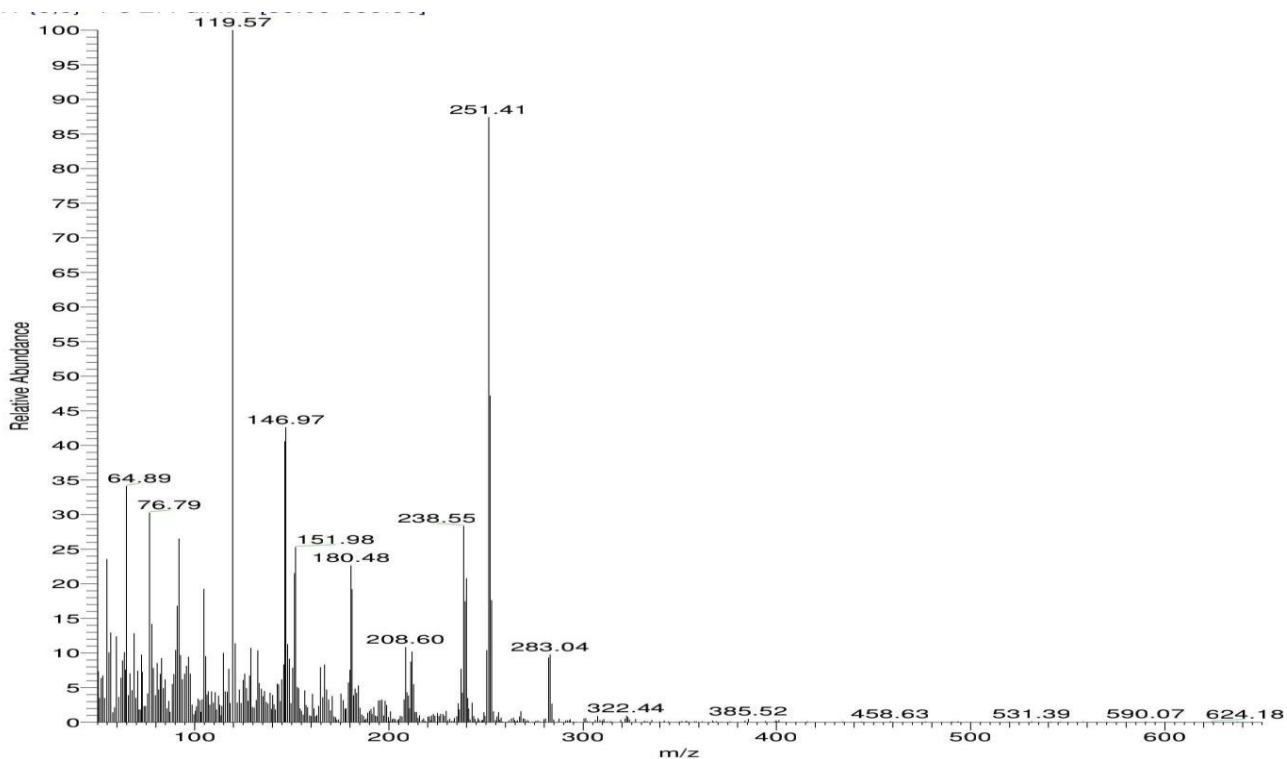

Figure S13. Mass spectrum of compound **3d**.

Supplementary Data

**(E)-N-(3-(3-(4-((6-Chloropyridazin-3-yl)oxy)phenyl)acryloyl)phenyl)acetamide (3e)**

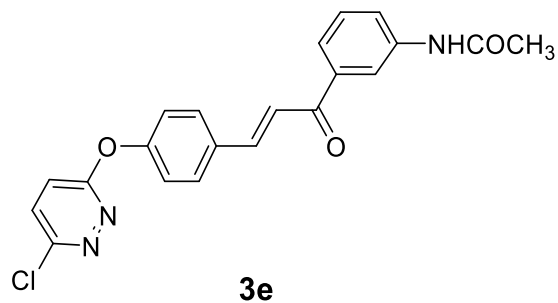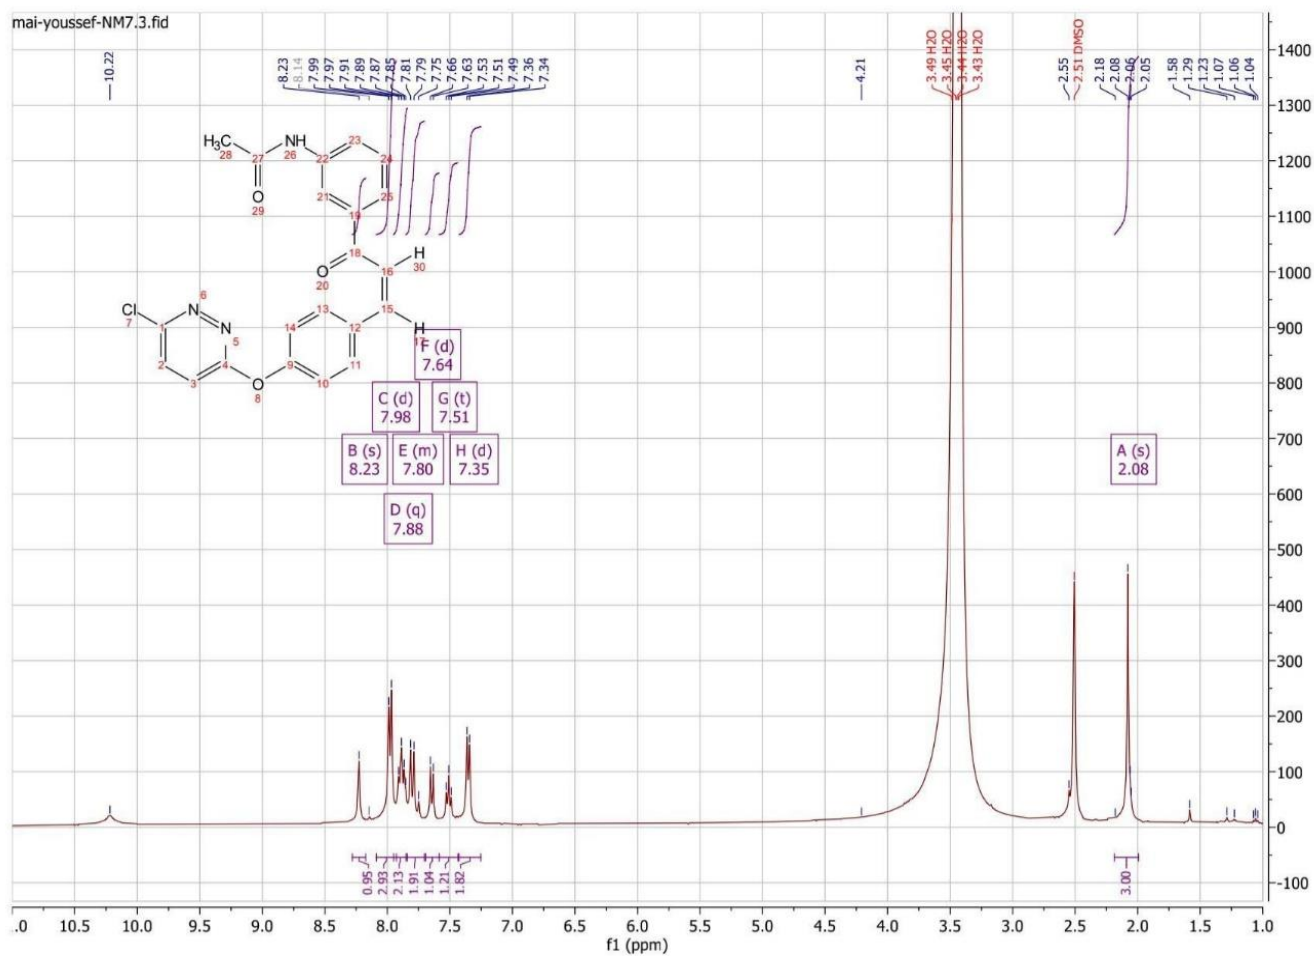

**Figure S14.**  $^1\text{H}$  NMR (400 MHz,  $\text{DMSO}-d_6$ ) spectrum of compound **3e**.

# Supplementary Data

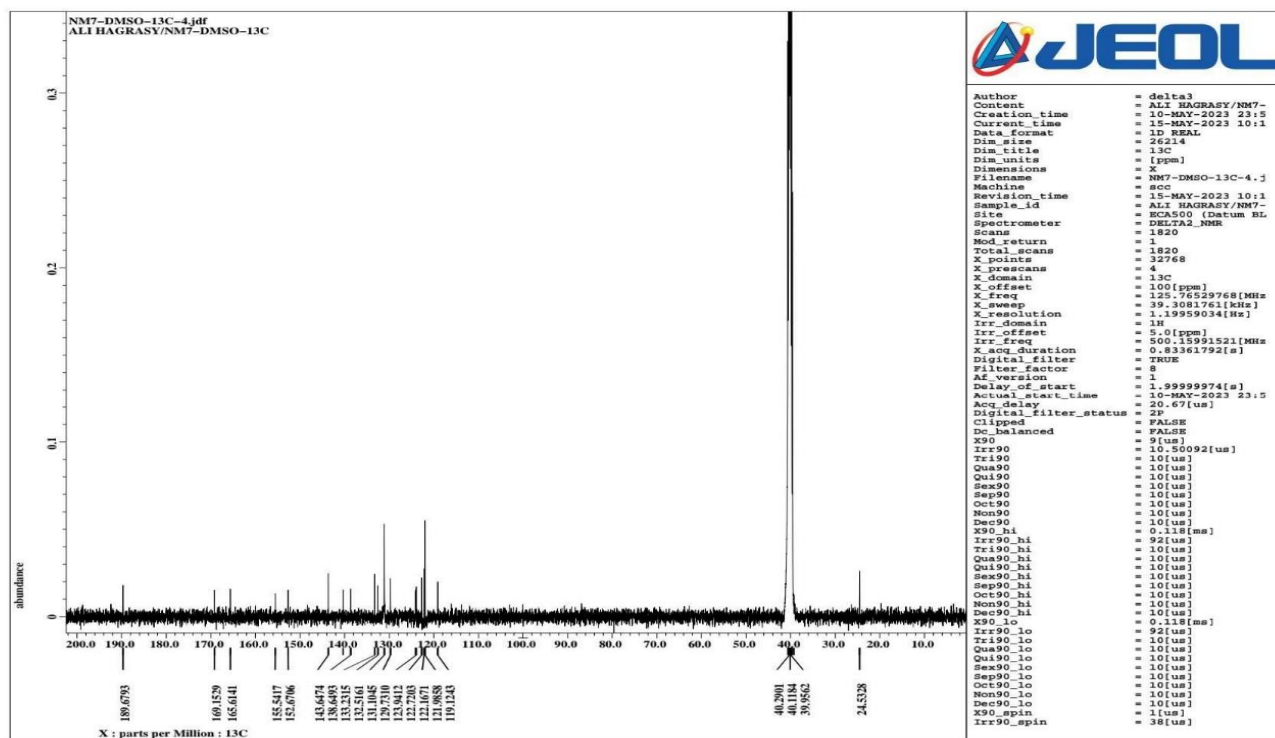

Figure S15.  $^{13}\text{C}$  NMR (100 MHz,  $\text{DMSO}-d_6$ ) spectrum of compound **3e**.

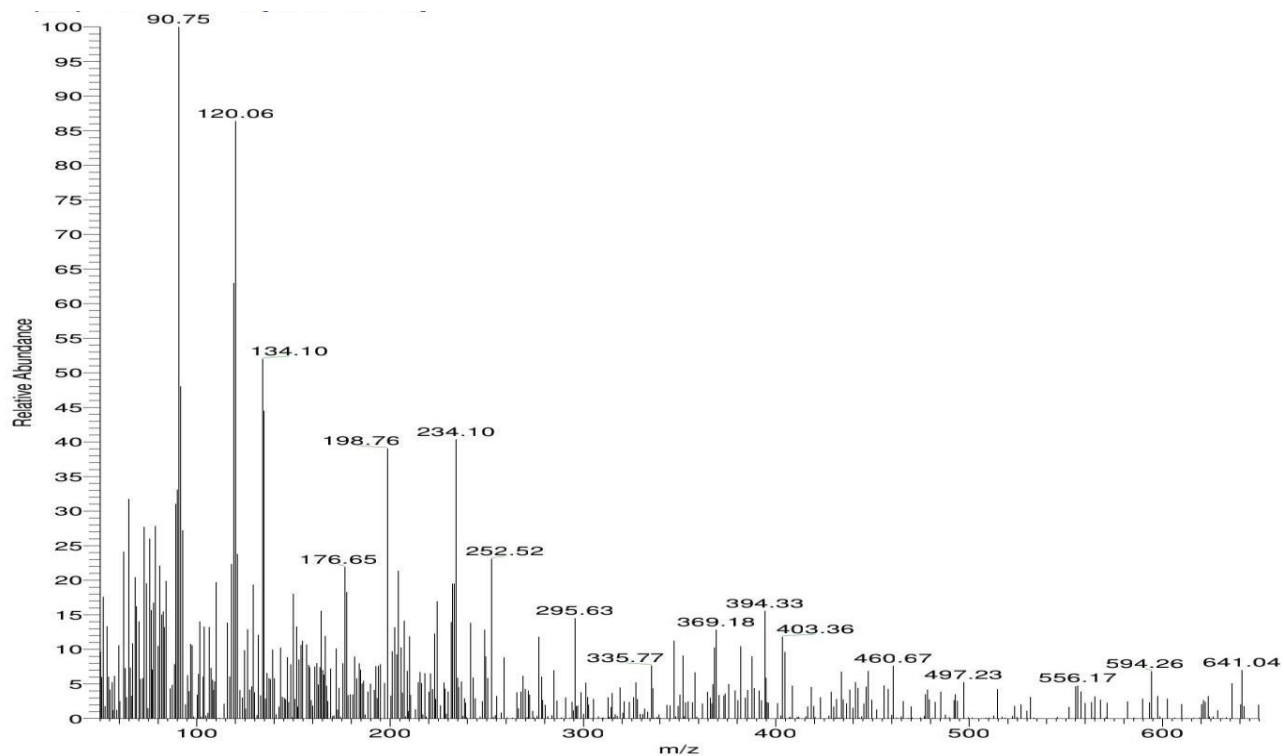

Figure S16. Mass spectrum of compound **3e**.

Supplementary Data

**(E)-3-(4-((6-Chloropyridazin-3-yl)oxy)phenyl)-1-(4-hydroxyphenyl)prop-2-en-1-one (3f)**

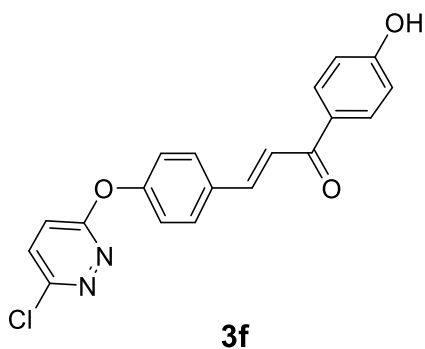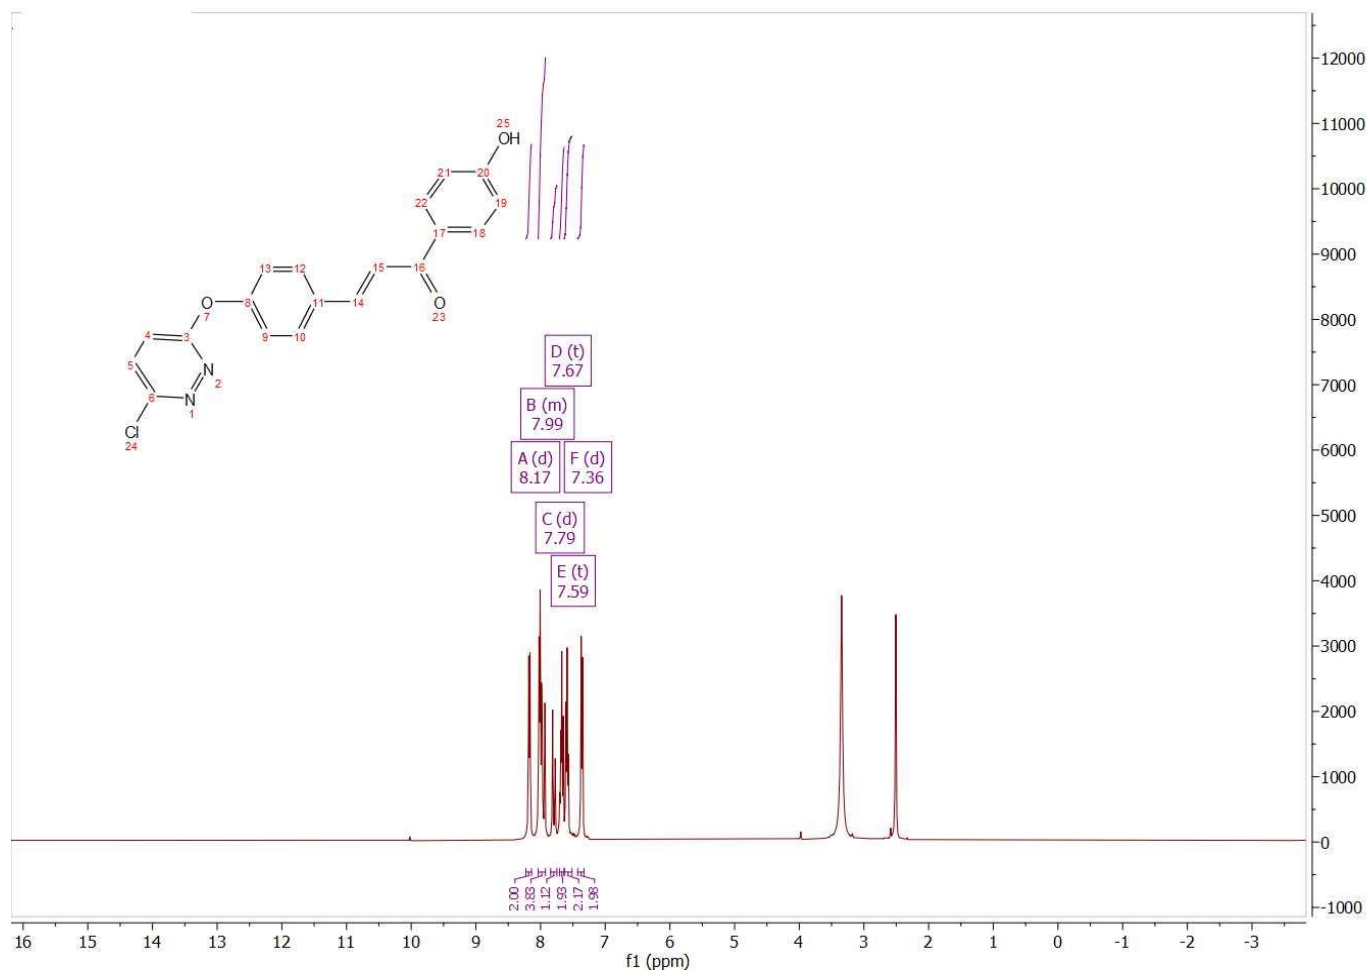

**Figure S17.**  $^1\text{H}$  NMR (400 MHz,  $\text{DMSO}-d_6$ ) spectrum of compound **3f**.



# Supplementary Data

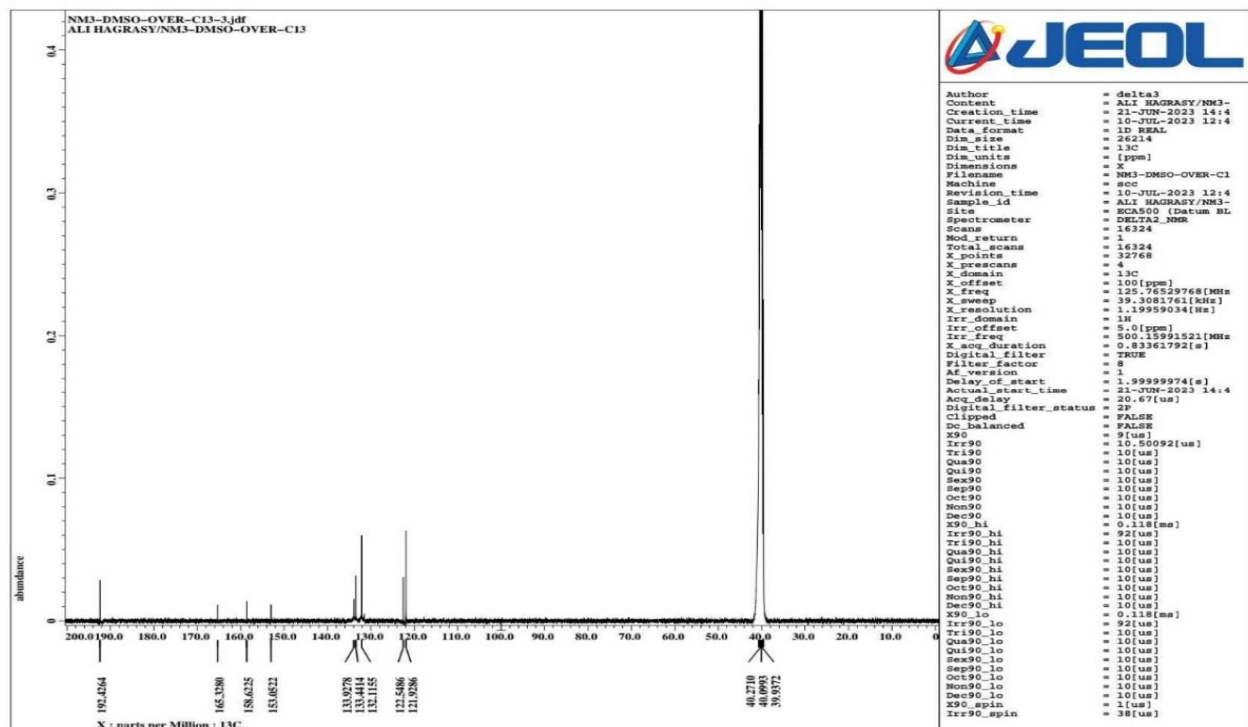

**Figure S18.**  $^{13}\text{C}$  NMR (100 MHz,  $\text{DMSO}-d_6$ ) spectrum of compound **3f**.

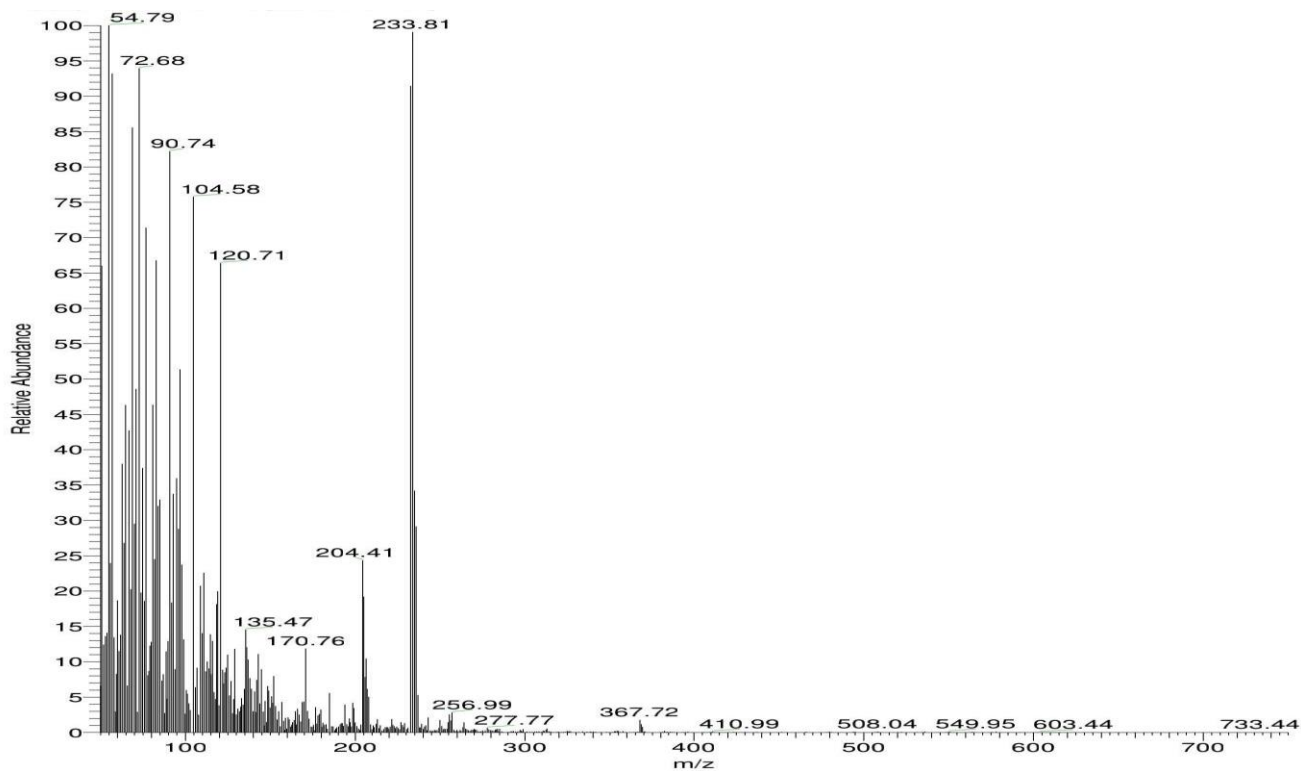

**Figure S19.** Mass spectrum of compound **3f**.

Supplementary Data

**(E)-3-(4-((6-Chloropyridazin-3-yl)oxy)phenyl)-1-(4-methoxyphenyl)prop-2-en-1-one (3g)**

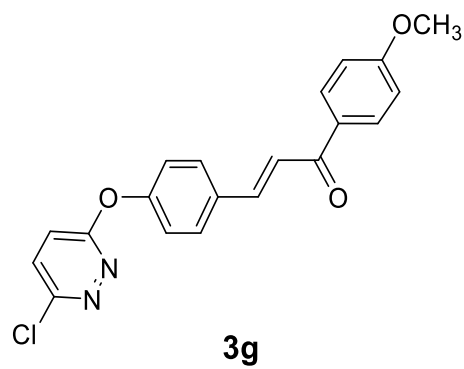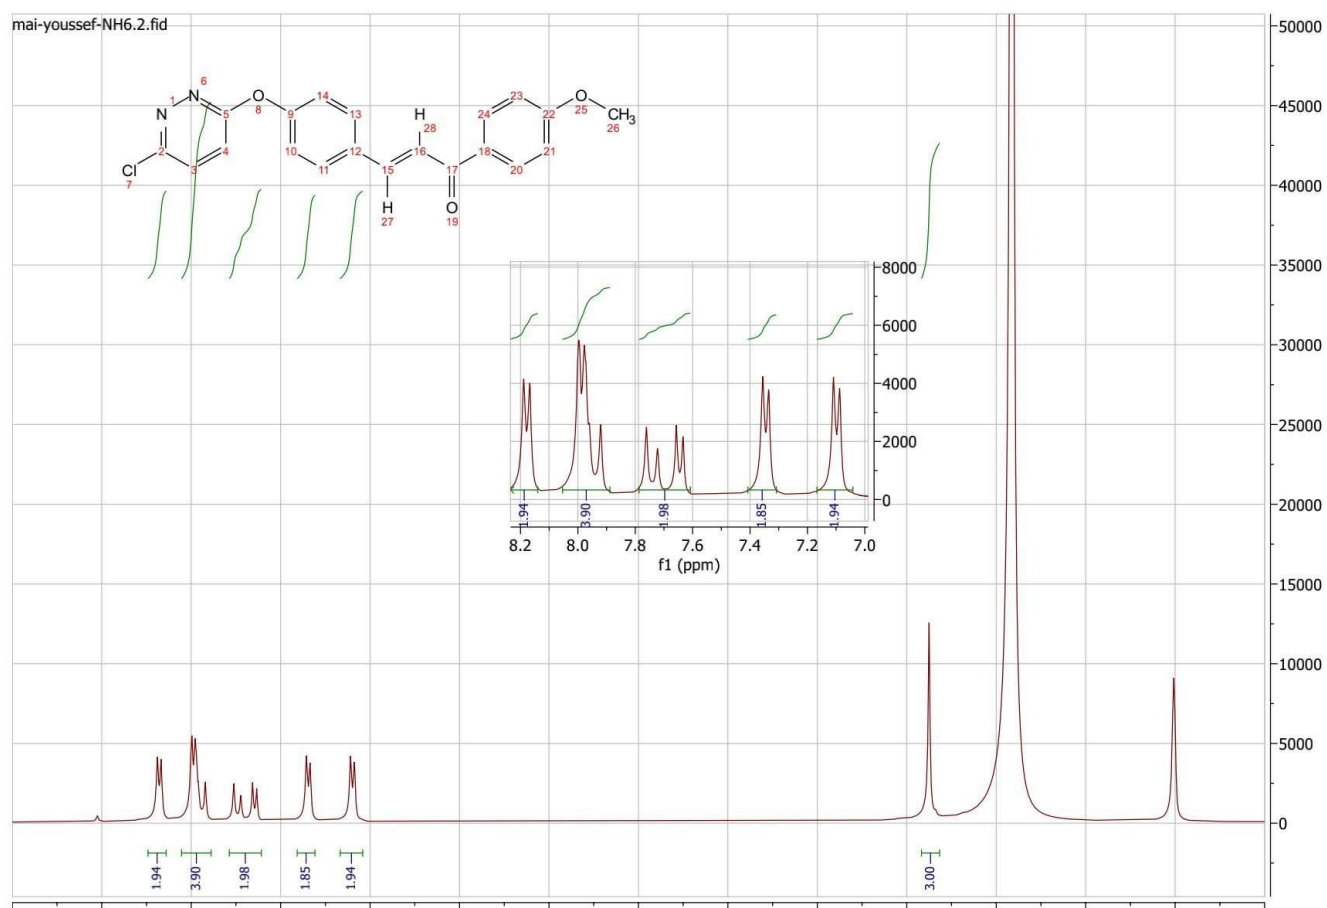

**Figure S20.**  $^1\text{H}$  NMR (400 MHz,  $\text{DMSO}-d_6$ ) spectrum of compound **3g**.

# Supplementary Data

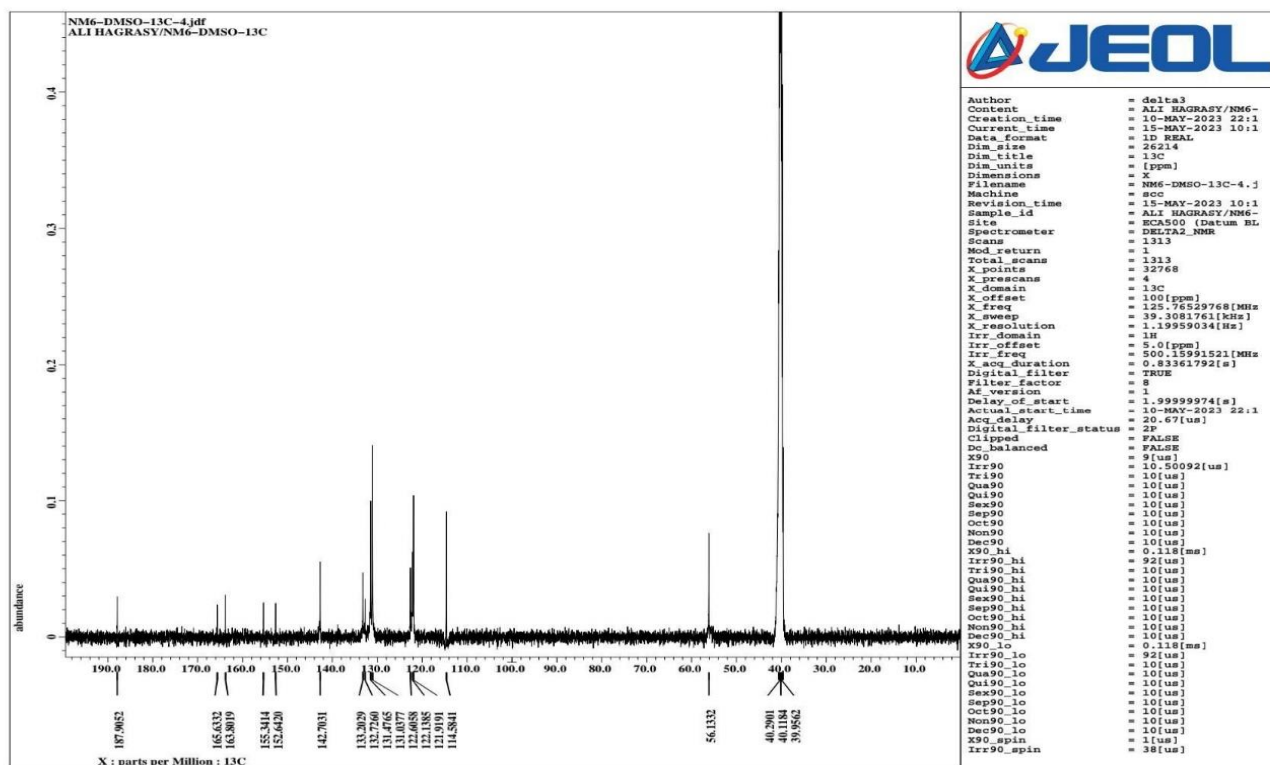

**Figure S21.**  $^{13}\text{C}$  NMR (100 MHz,  $\text{DMSO}-d_6$ ) spectrum of compound **3g**.

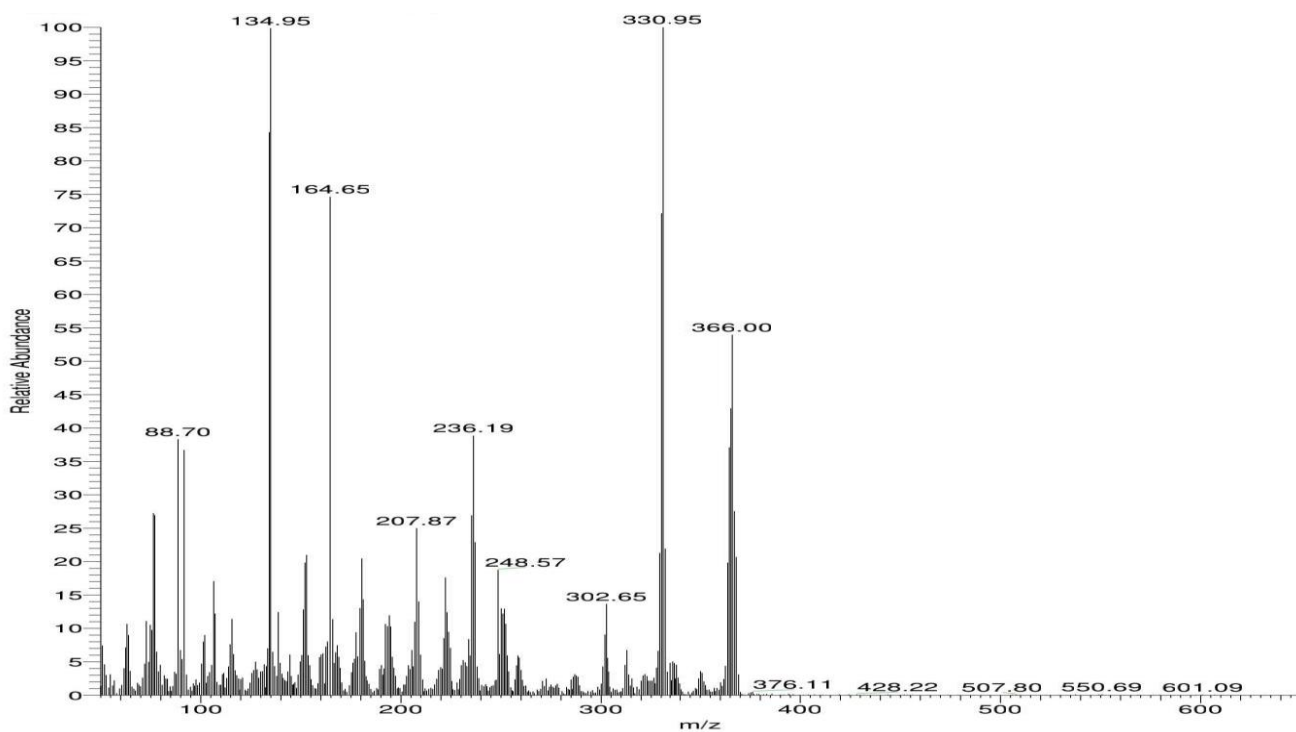

**Figure S22.** Mass spectrum of compound **3g**.

Supplementary Data

**(E)-3-(4-((6-Chloropyridazin-3-yl)oxy)phenyl)-1-(4-nitrophenyl)prop-2-en-1-one (3h)**

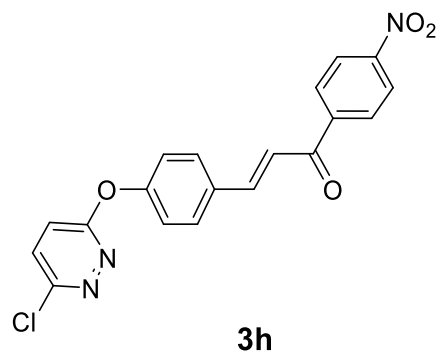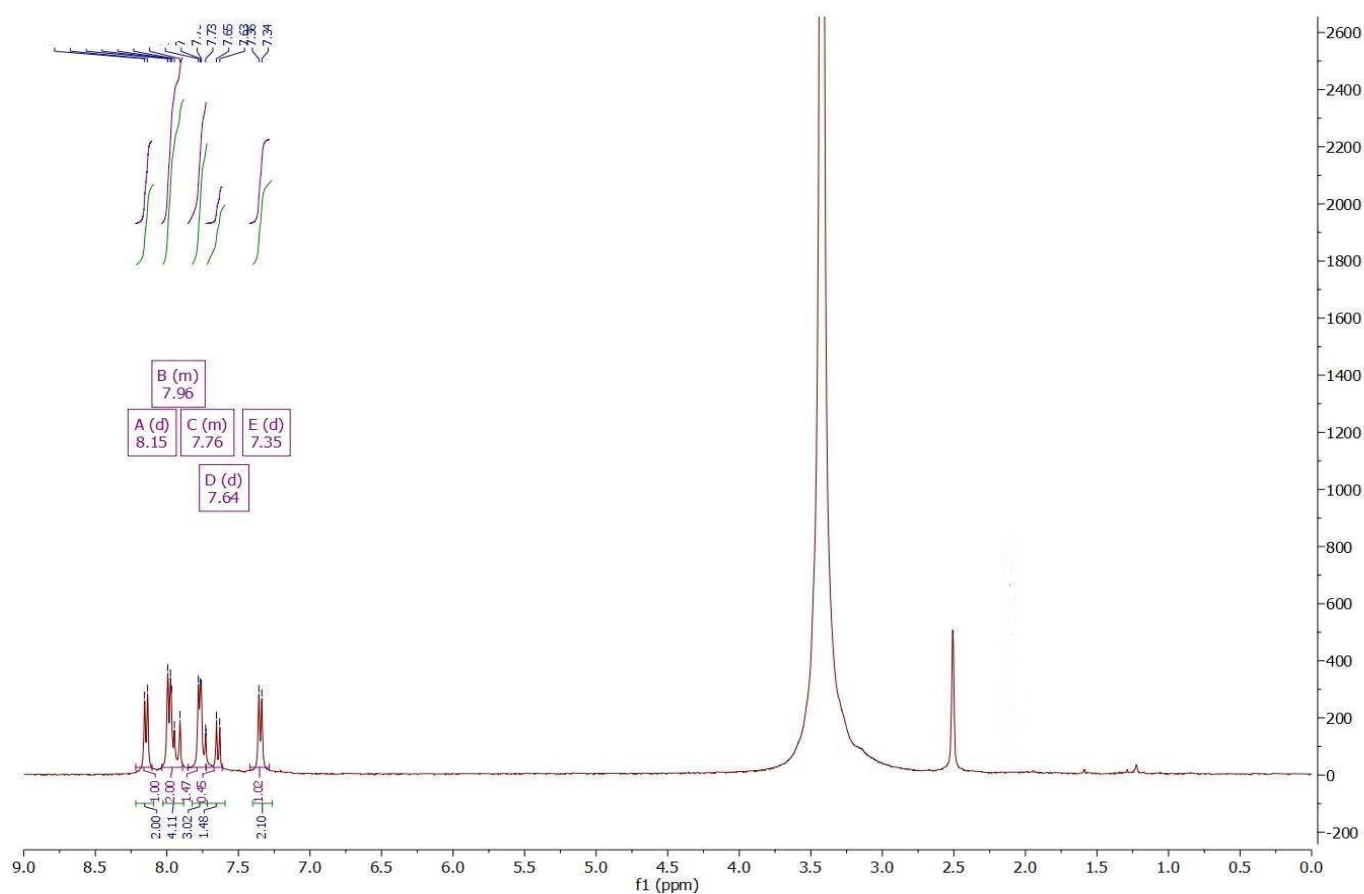

**Figure S23.**  $^1\text{H}$  NMR (400 MHz,  $\text{DMSO}-d_6$ ) spectrum of compound **3h**.

Supplementary Data

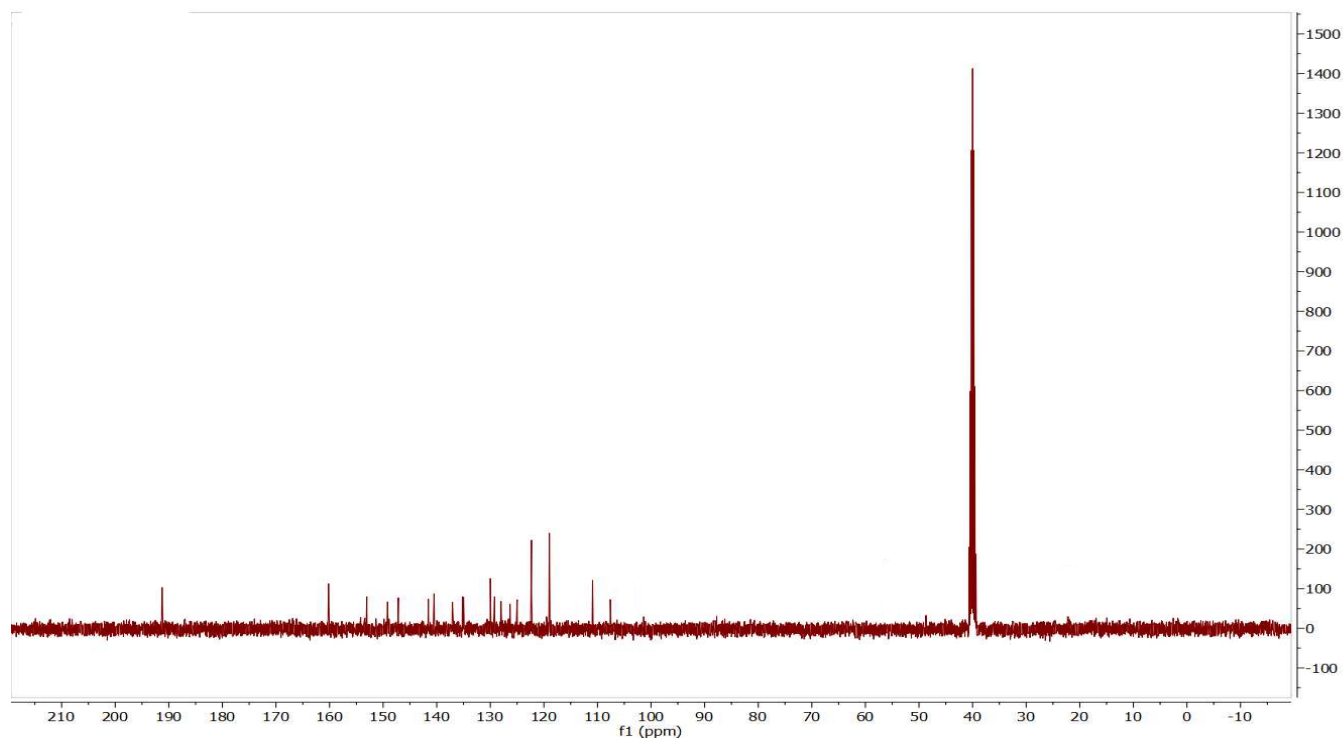

**Figure S24.**  $^{13}\text{C}$  NMR (100 MHz,  $\text{DMSO}-d_6$ ) spectrum of compound **3h**.

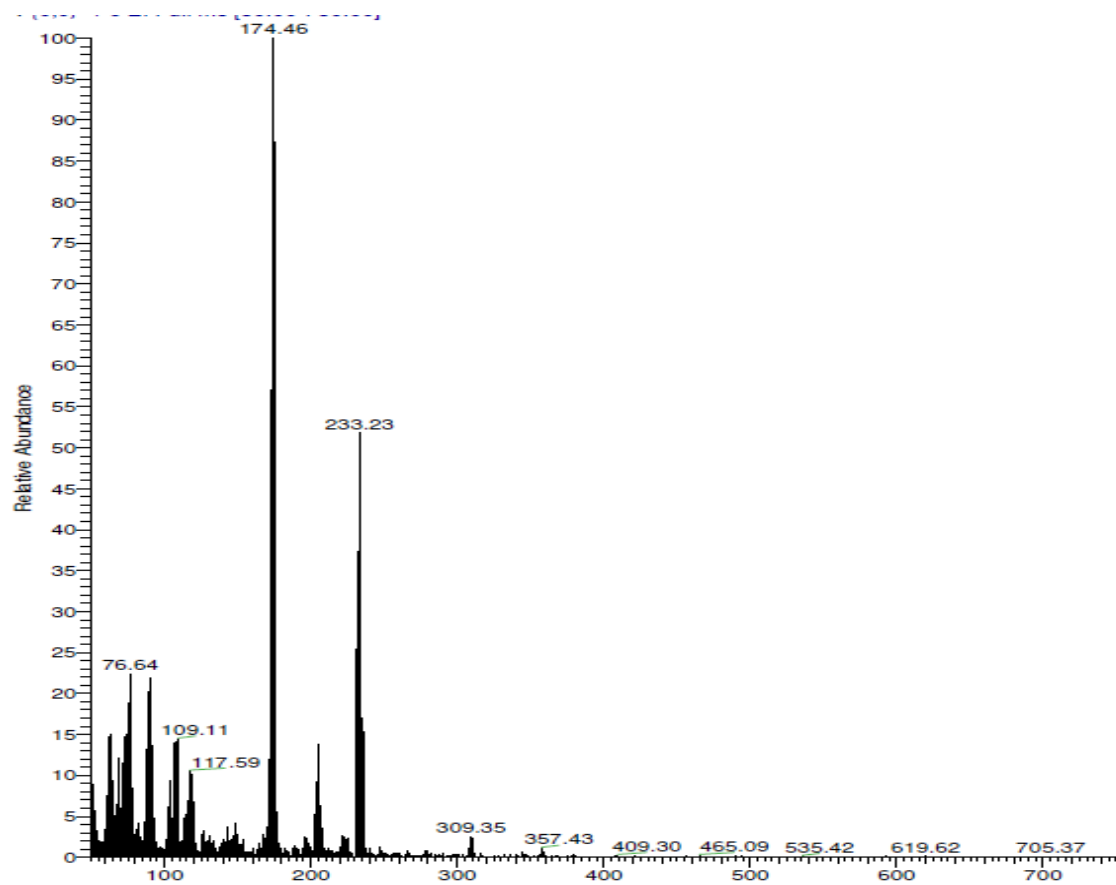

Supplementary Data

**Figure S25.** Mass spectrum of compound **3h**.

**(E)-1-(4-(Benzyloxy)phenyl)-3-(4-((6-chloropyridazin-3-yl)oxy)phenyl)prop-2-en-1-one (4a)**

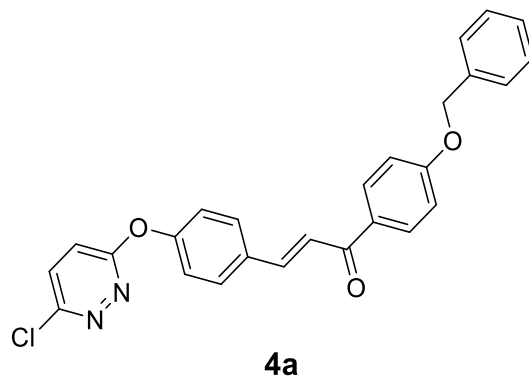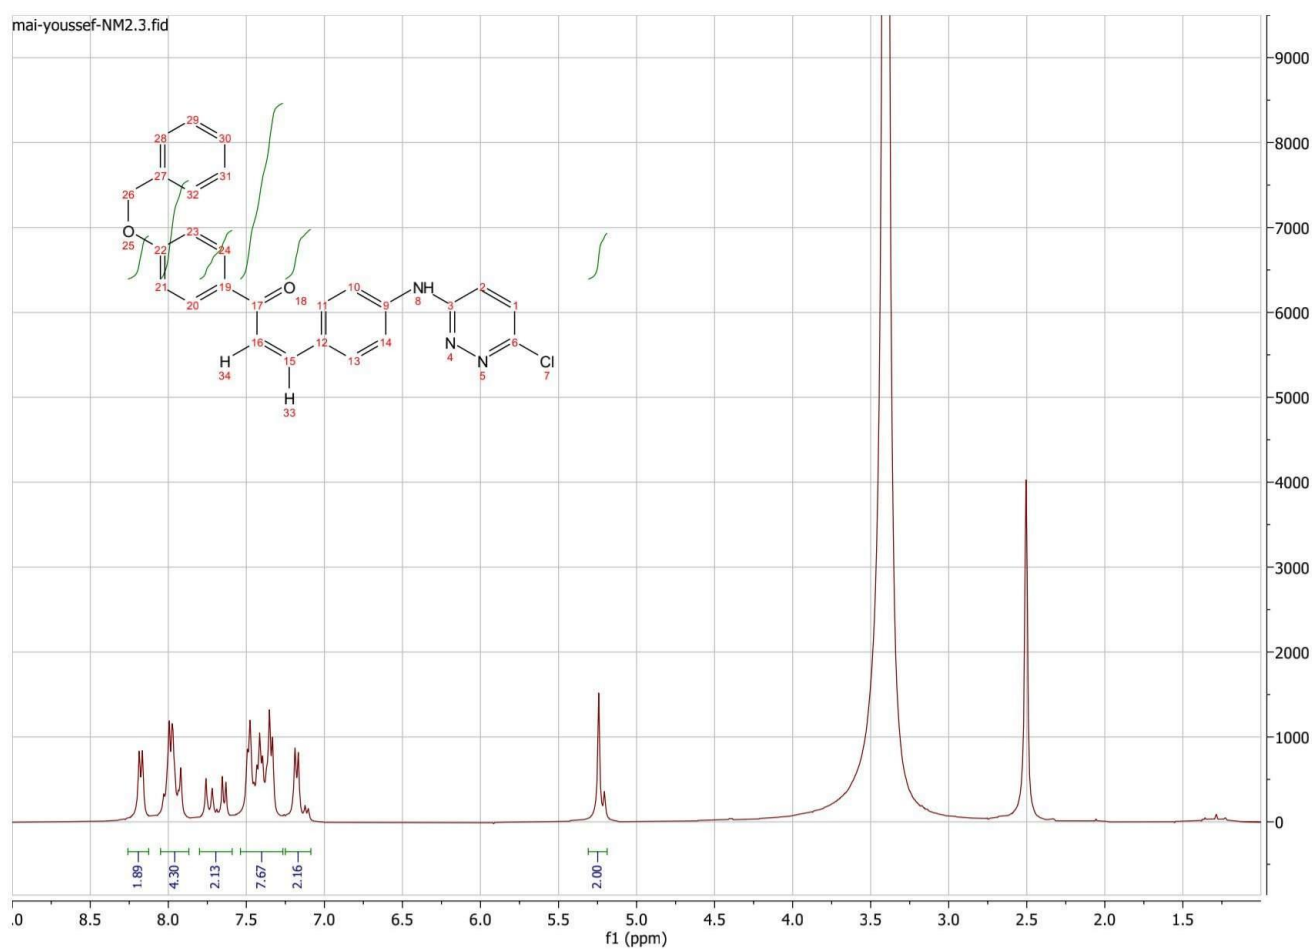

**Figure S26.** <sup>1</sup>H NMR (400 MHz, DMSO-*d*<sub>6</sub>) spectrum of compound **4a**.

# Supplementary Data

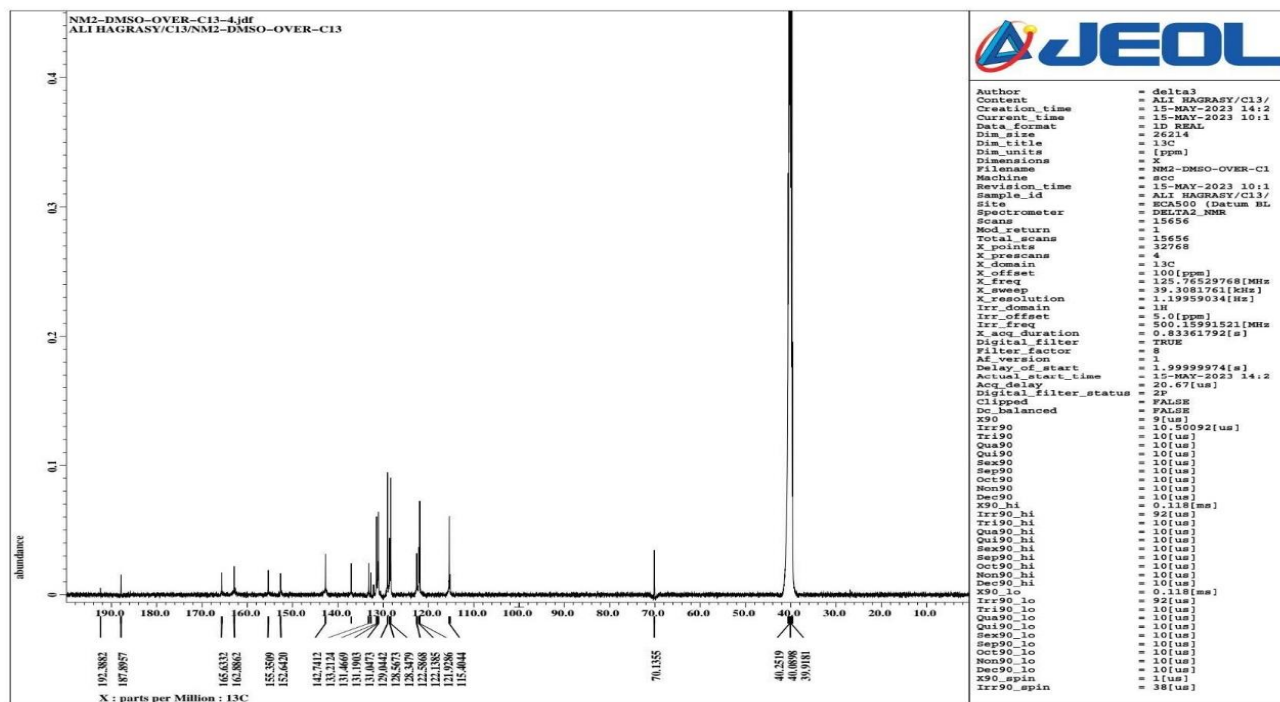

Figure S27.  $^{13}\text{C}$  NMR (100 MHz, DMSO- $d_6$ ) spectrum of compound 4a.

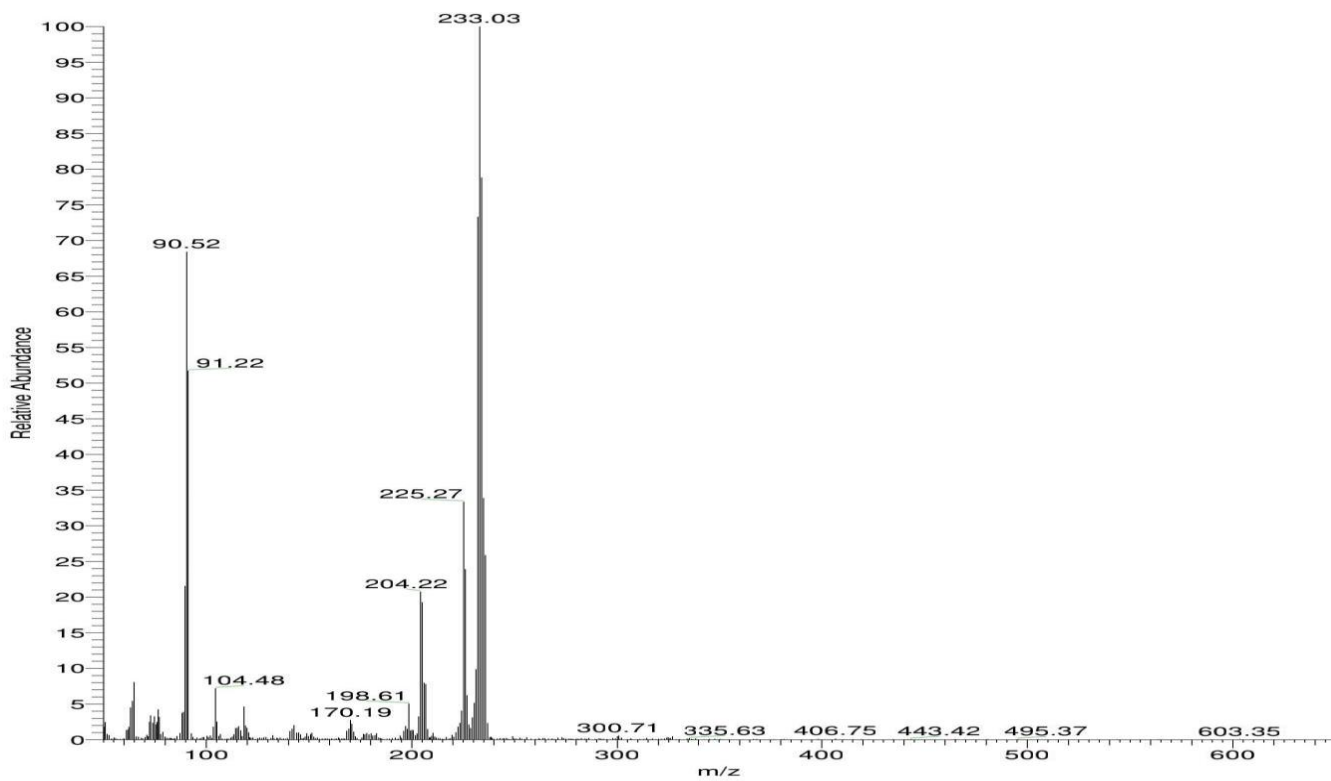

Figure S28. Mass spectrum of compound 4a.

Supplementary Data

***(E)*-3-(4-((6-Chloropyridazin-3-yl)oxy)phenyl)-1-(4-((2,4-dichlorobenzyl)oxy)phenyl)prop-2-en-1-one**  
**(4b)**

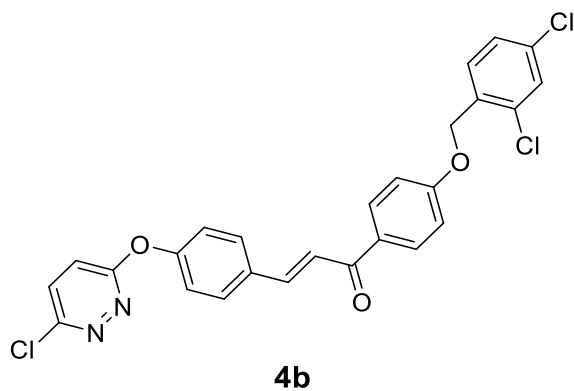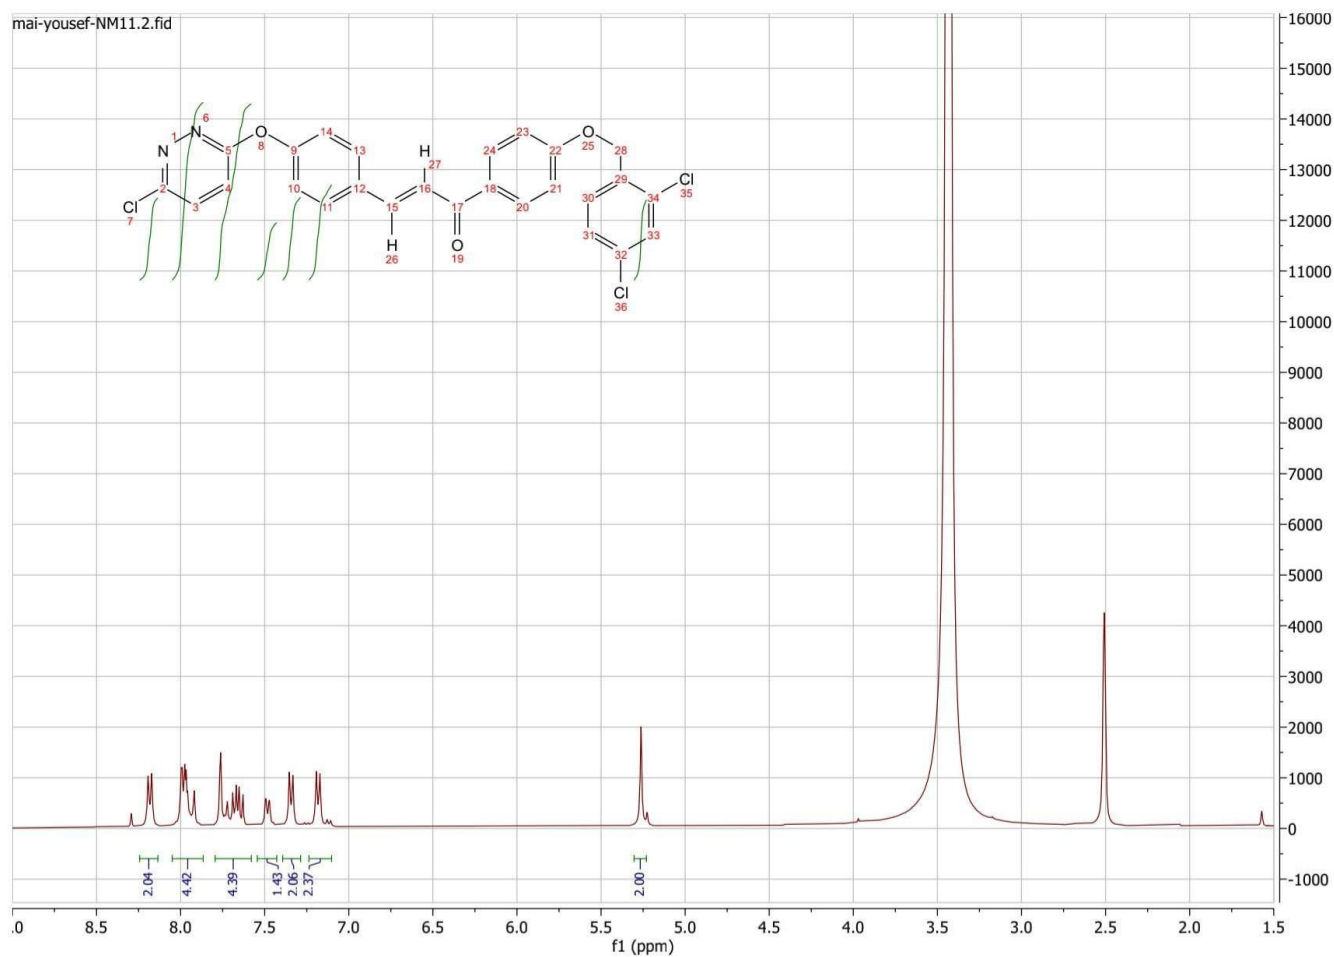

**Figure S29.** <sup>1</sup>H NMR (400 MHz, DMSO-*d*<sub>6</sub>) spectrum of compound **4b**.



# Supplementary Data

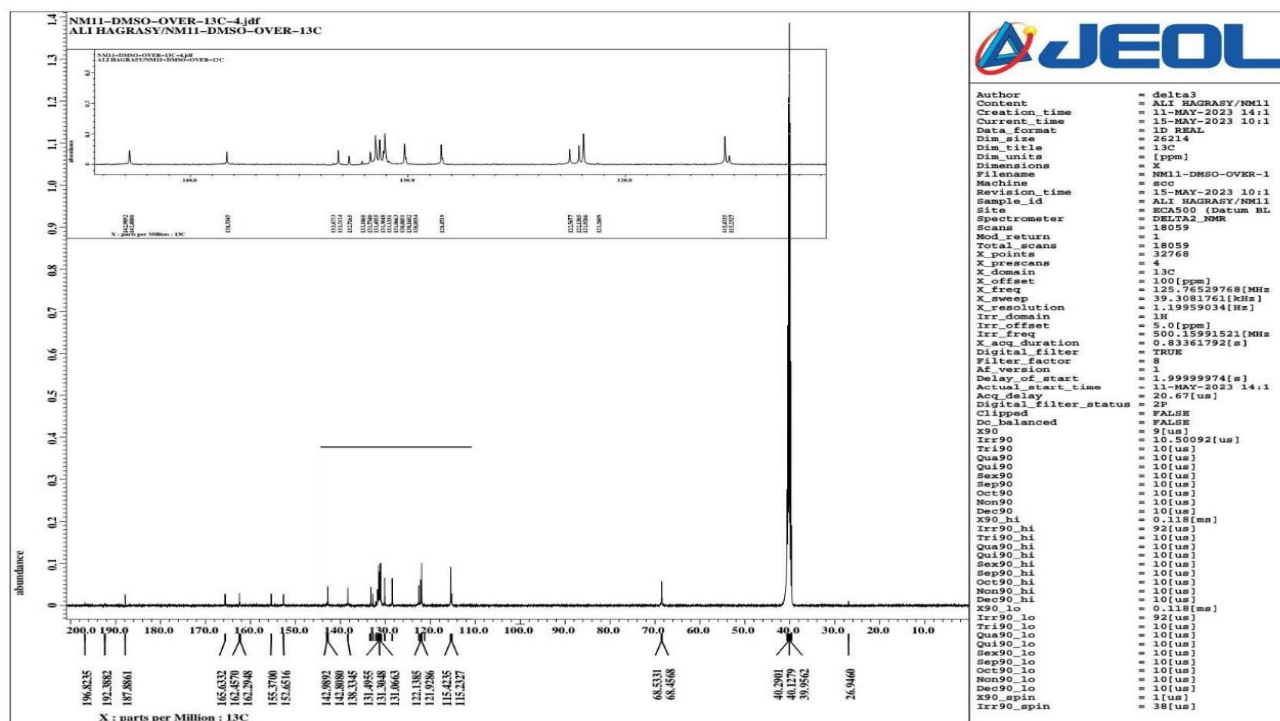

**Figure S30.** <sup>13</sup>C NMR (100 MHz, DMSO-*d*<sub>6</sub>) spectrum of compound 4b.

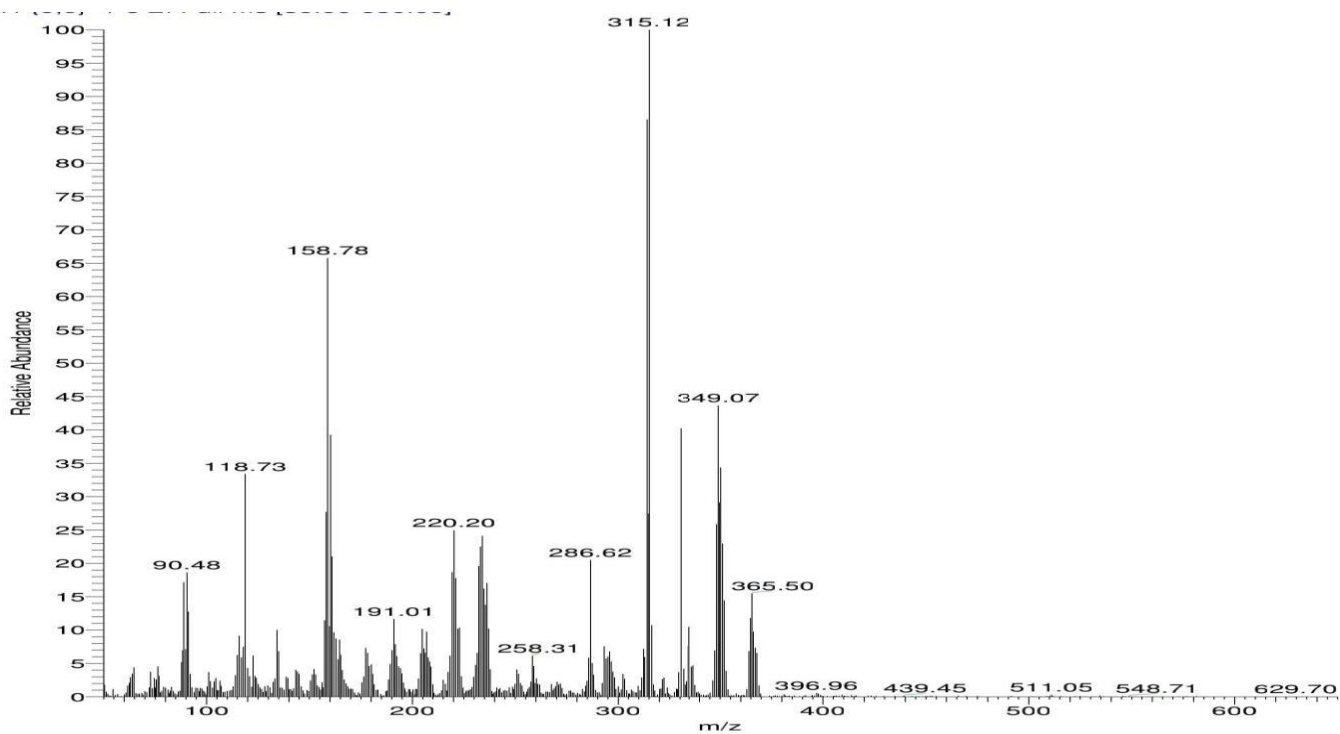

**Figure S31.** Mass spectrum of compound 4b.

Supplementary Data

*(E)*-1-(4-((3-Chloro-4-fluorobenzyl)oxy)phenyl)-3-(4-(((6-chloropyridazin-3-yl)oxy)phenyl)prop-2-en-1-one (4c)

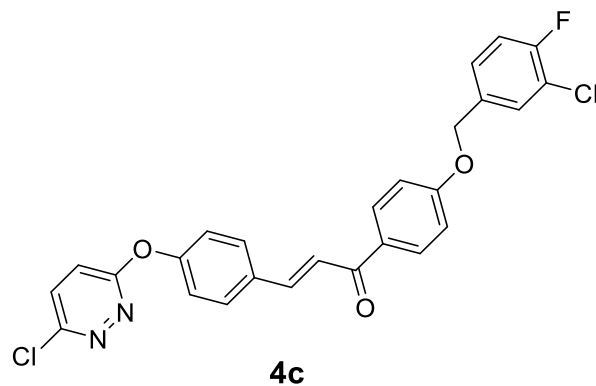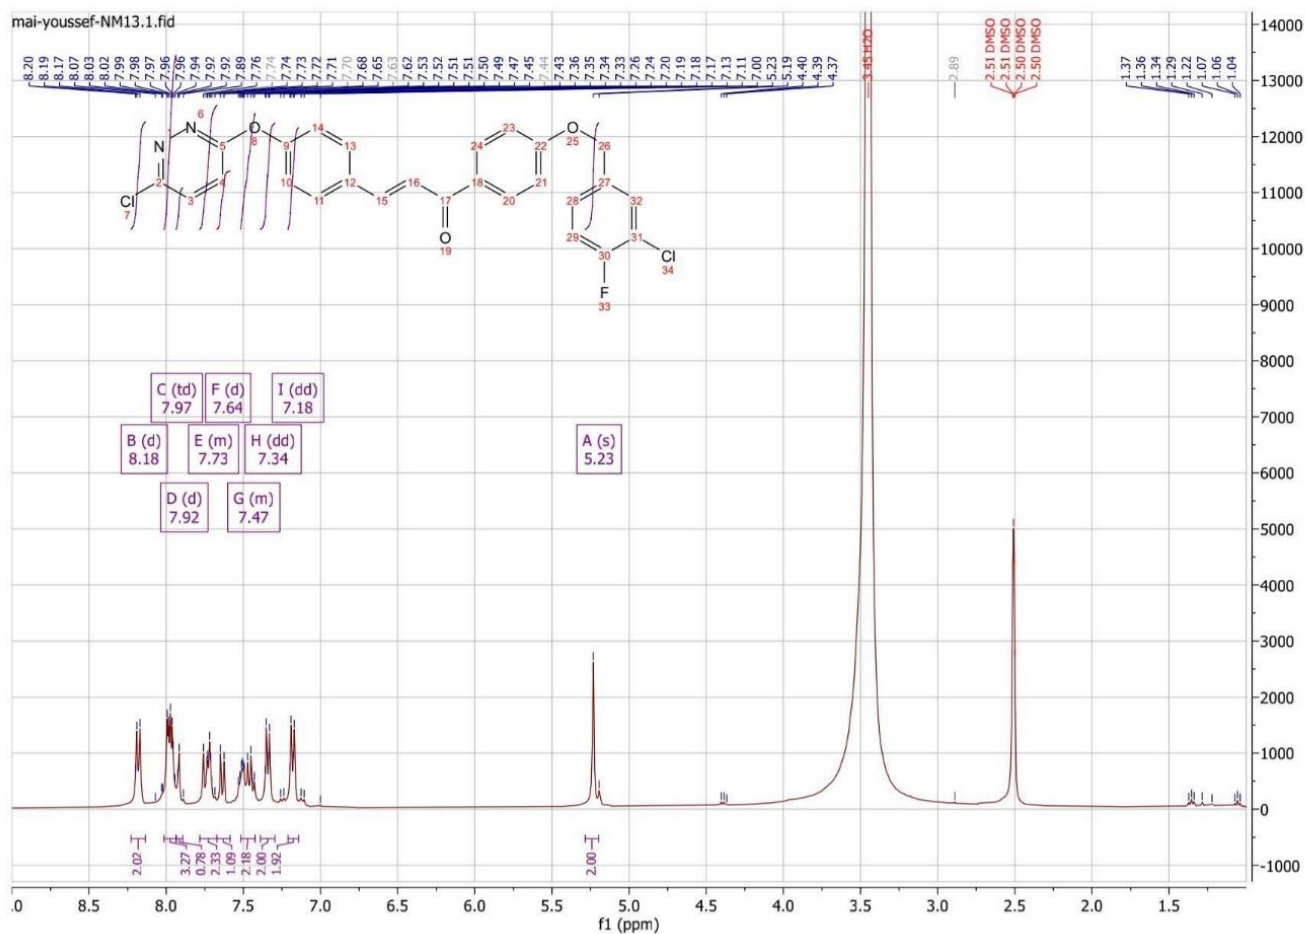

**Figure S32.**  $^1\text{H}$  NMR (400 MHz,  $\text{DMSO}-d_6$ ) spectrum of compound **4c**.

# Supplementary Data

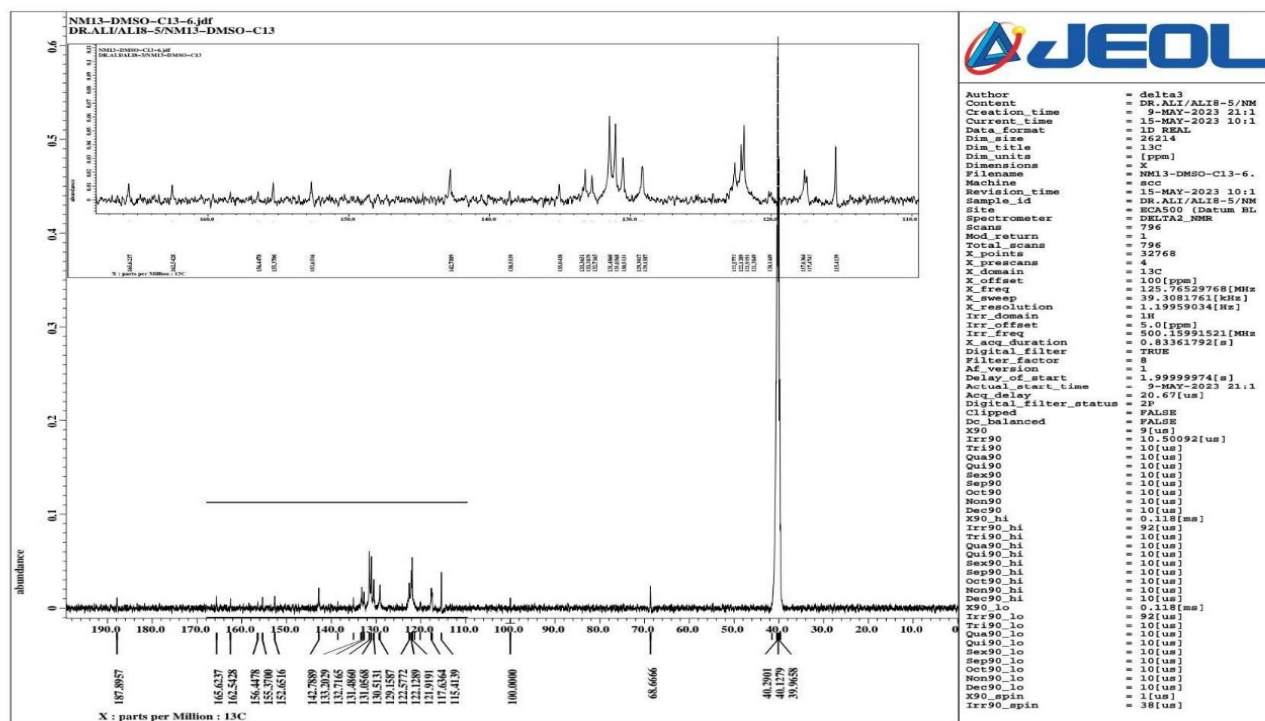

**Figure S33.**  $^{13}\text{C}$  NMR (100 MHz, DMSO- $d_6$ ) spectrum of compound 4c.

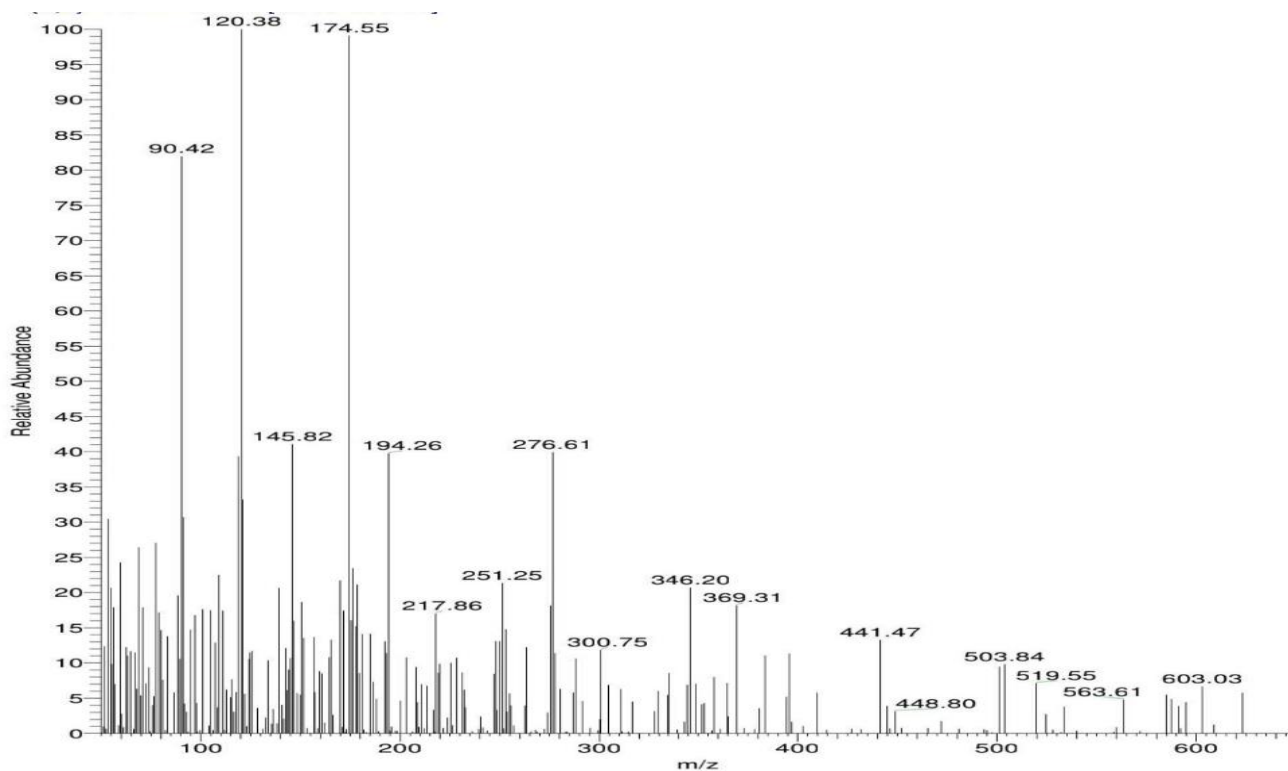

**Figure S34.** Mass spectrum of compound 4c.

Supplementary Data

**(E)-3-(4-((6-Chloropyridazin-3-yl)oxy)phenyl)-1-(4-((4-(trifluoromethoxy)benzyl)oxy)phenyl)prop-2-en-1-one (4d)**

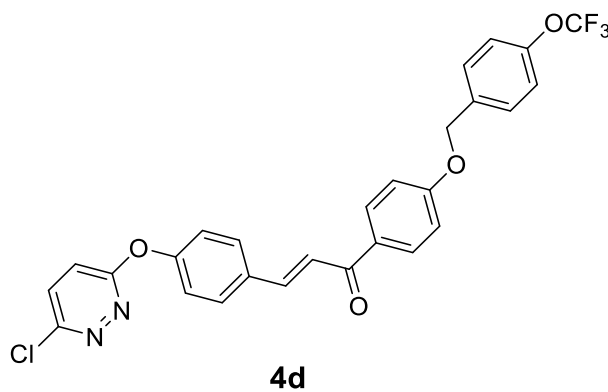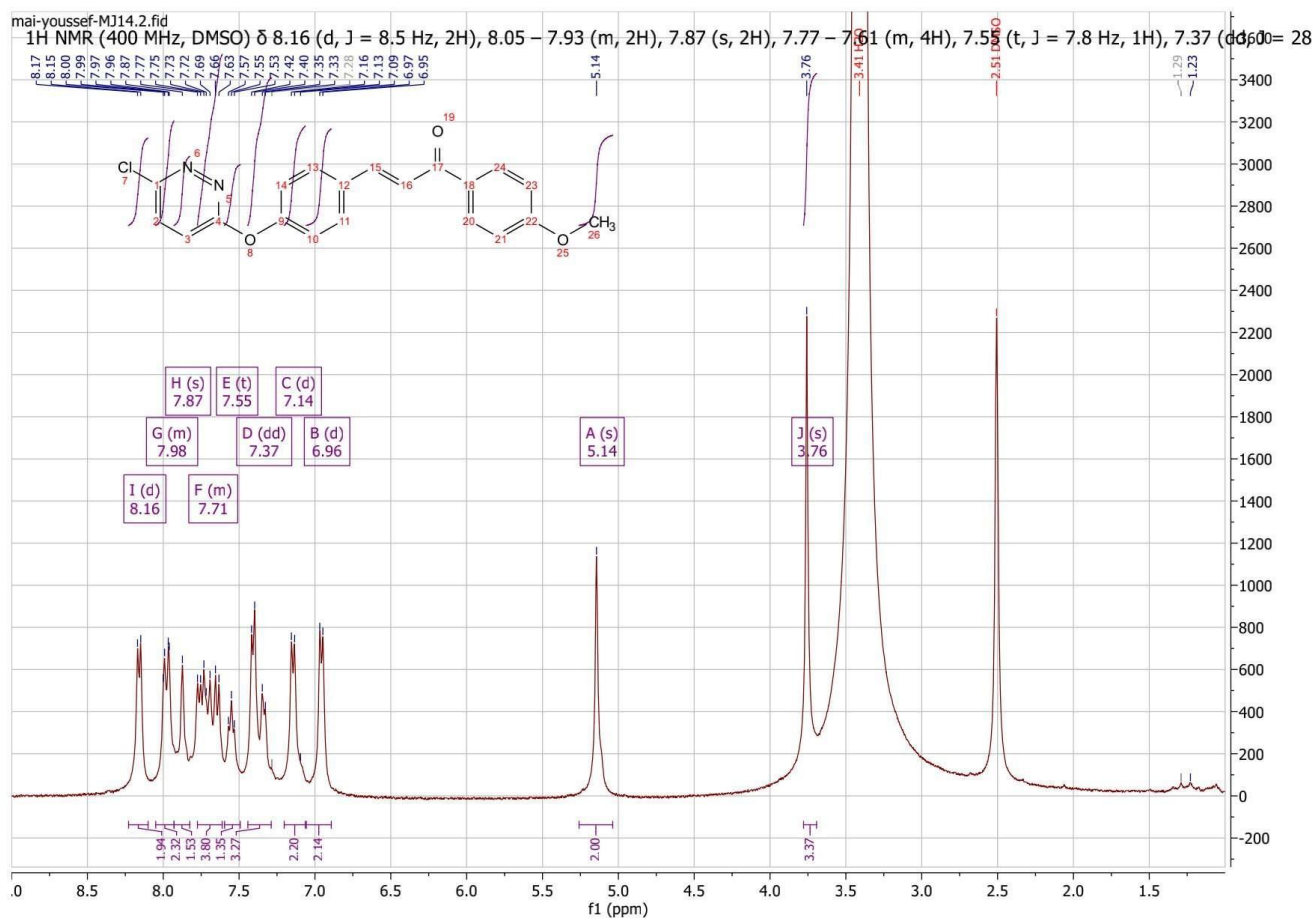

**Figure S35.** <sup>1</sup>H NMR (400 MHz, DMSO-*d*<sub>6</sub>) spectrum of compound **4d**.

# Supplementary Data

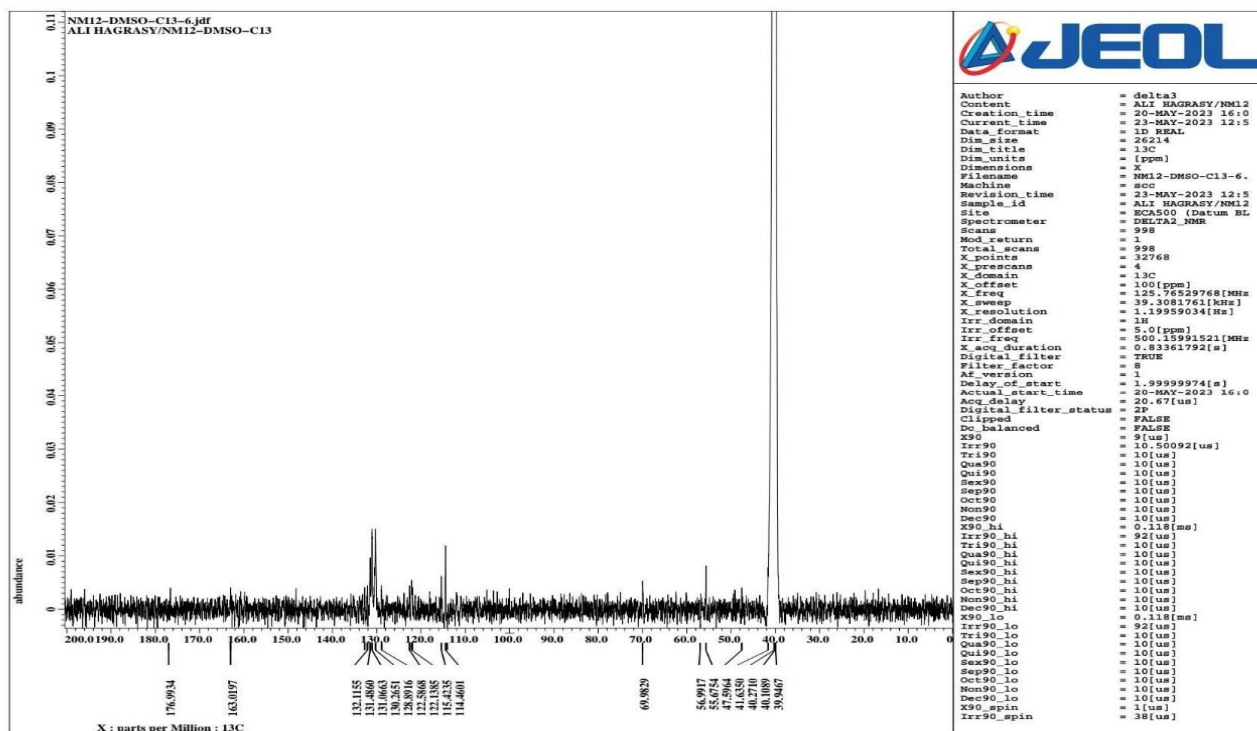

**Figure S36.**  $^{13}\text{C}$  NMR (100 MHz,  $\text{DMSO-}d_6$ ) spectrum of compound **4d**.

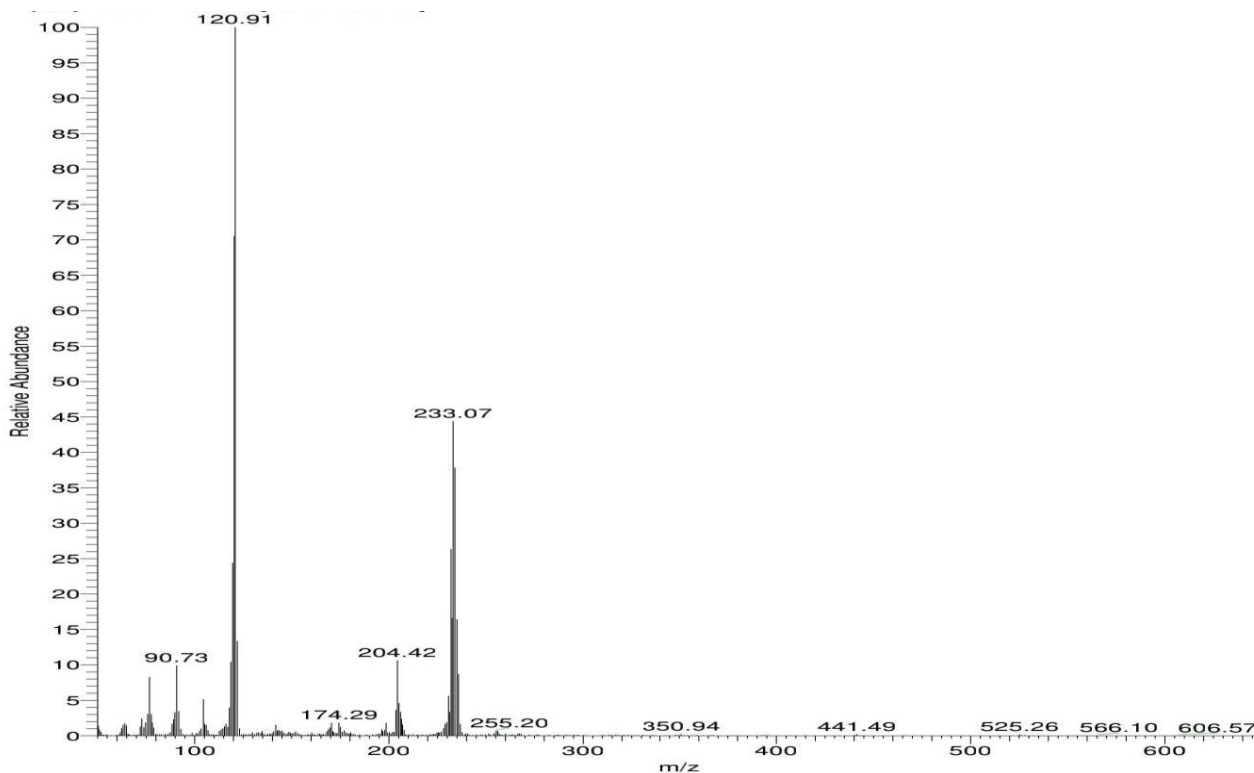

**Figure S37.** Mass spectrum of compound **4d**.

Supplementary Data

**(E)-3-(4-(((6-Chloropyridazin-3-yl)oxy)phenyl)-1-(4-((4-methoxybenzyl)oxy)phenyl)prop-2-en-1-one**  
**(4e)**

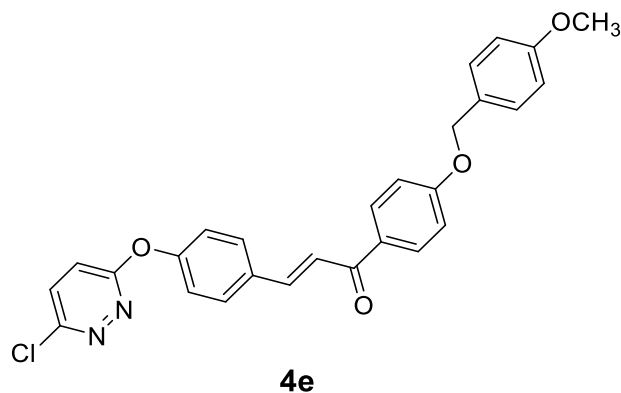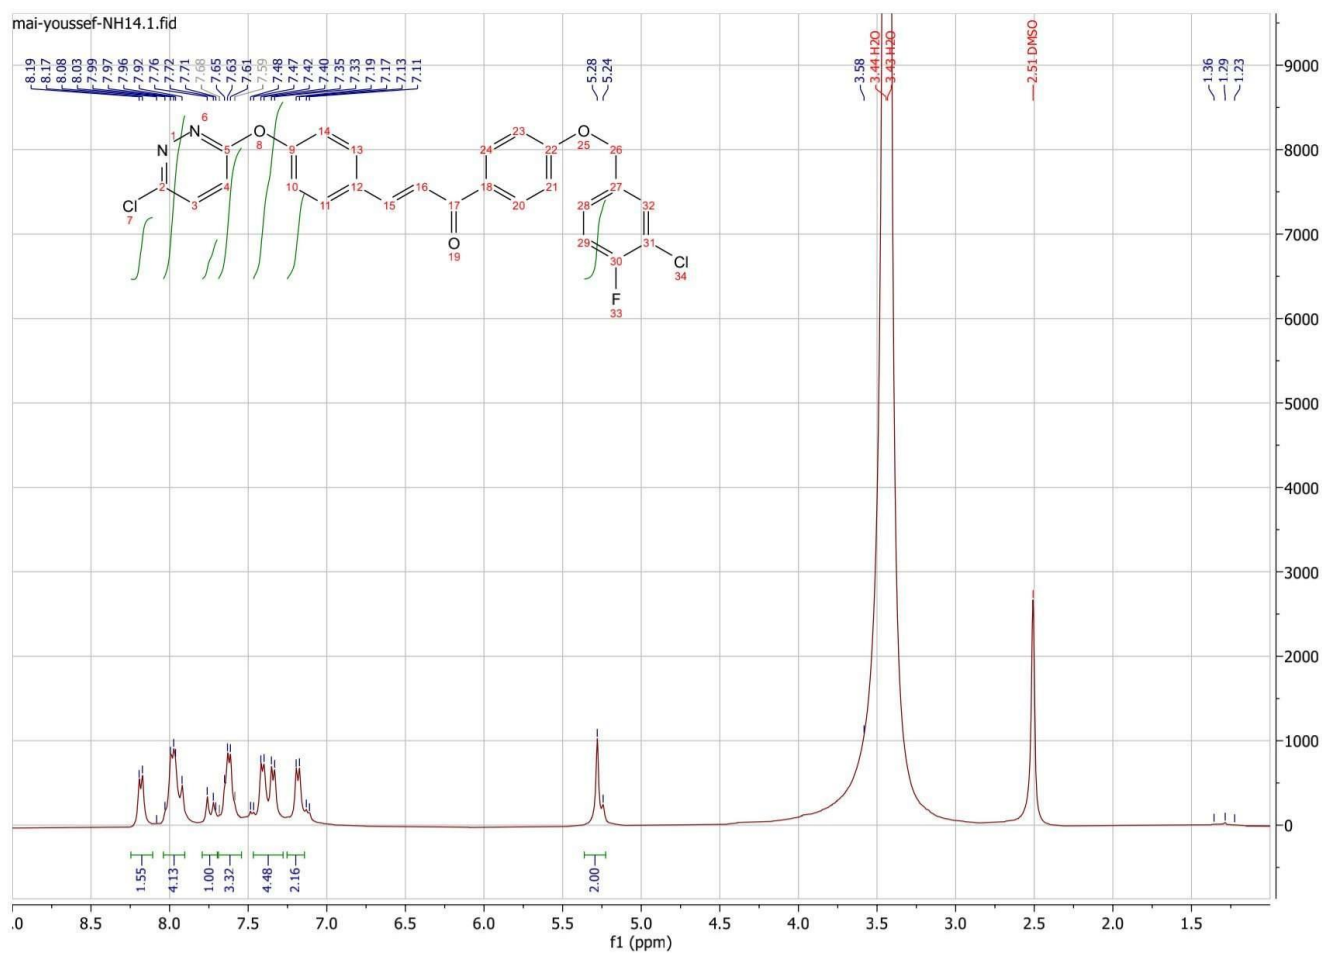

**Figure S38.**  $^1\text{H}$  NMR (400 MHz,  $\text{DMSO-}d_6$ ) spectrum of compound **4e**.

# Supplementary Data

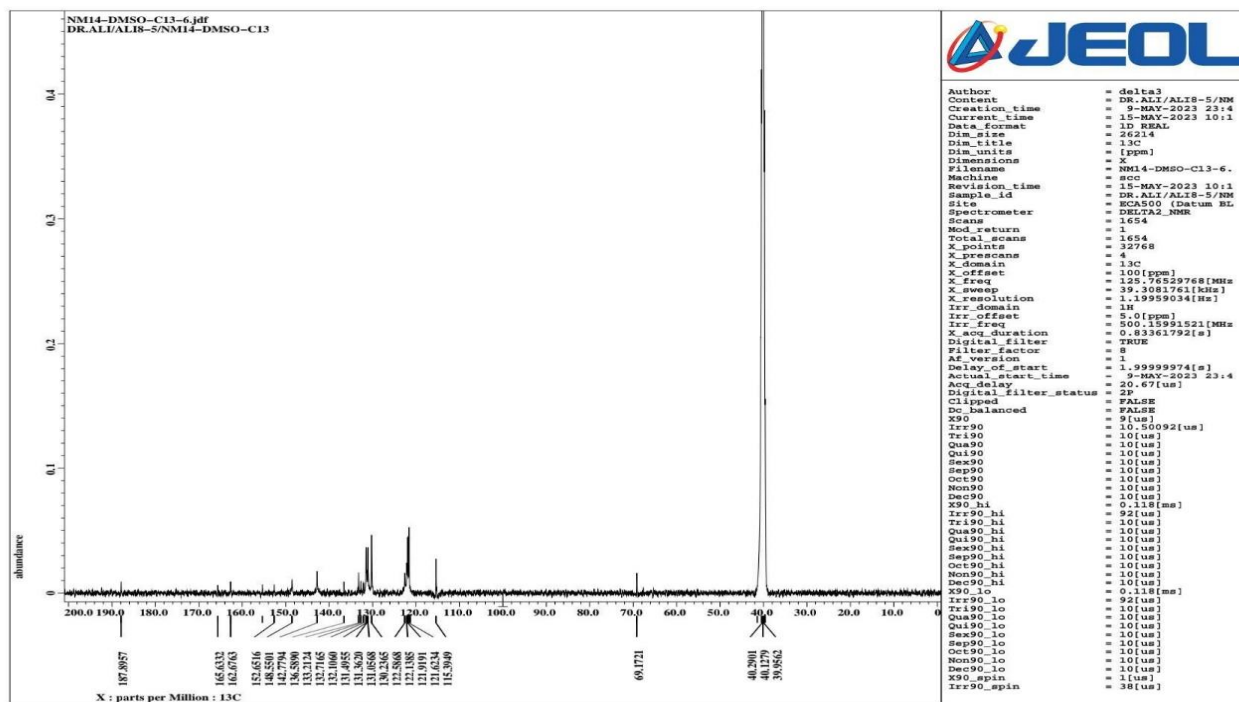

**Figure S39.**  $^{13}\text{C}$  NMR (100 MHz,  $\text{DMSO}-d_6$ ) spectrum of compound **4e**.

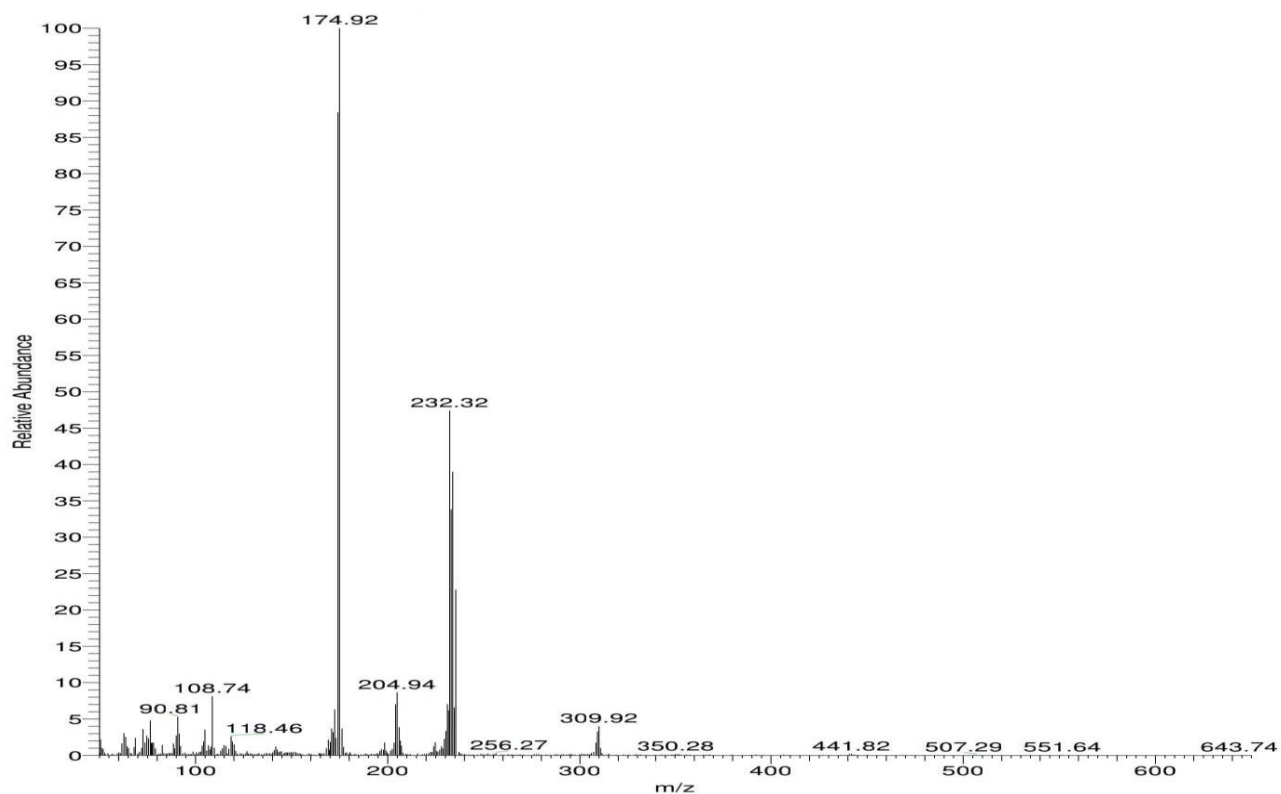

**Figure S40.** Mass spectrum of compound **4e**.



Supplementary Data

**(E)-5-(4-((6-Chloropyridazin-3-yl)oxy)benzylidene)thiazolidine-2,4-dione (5)**

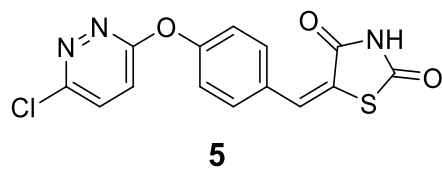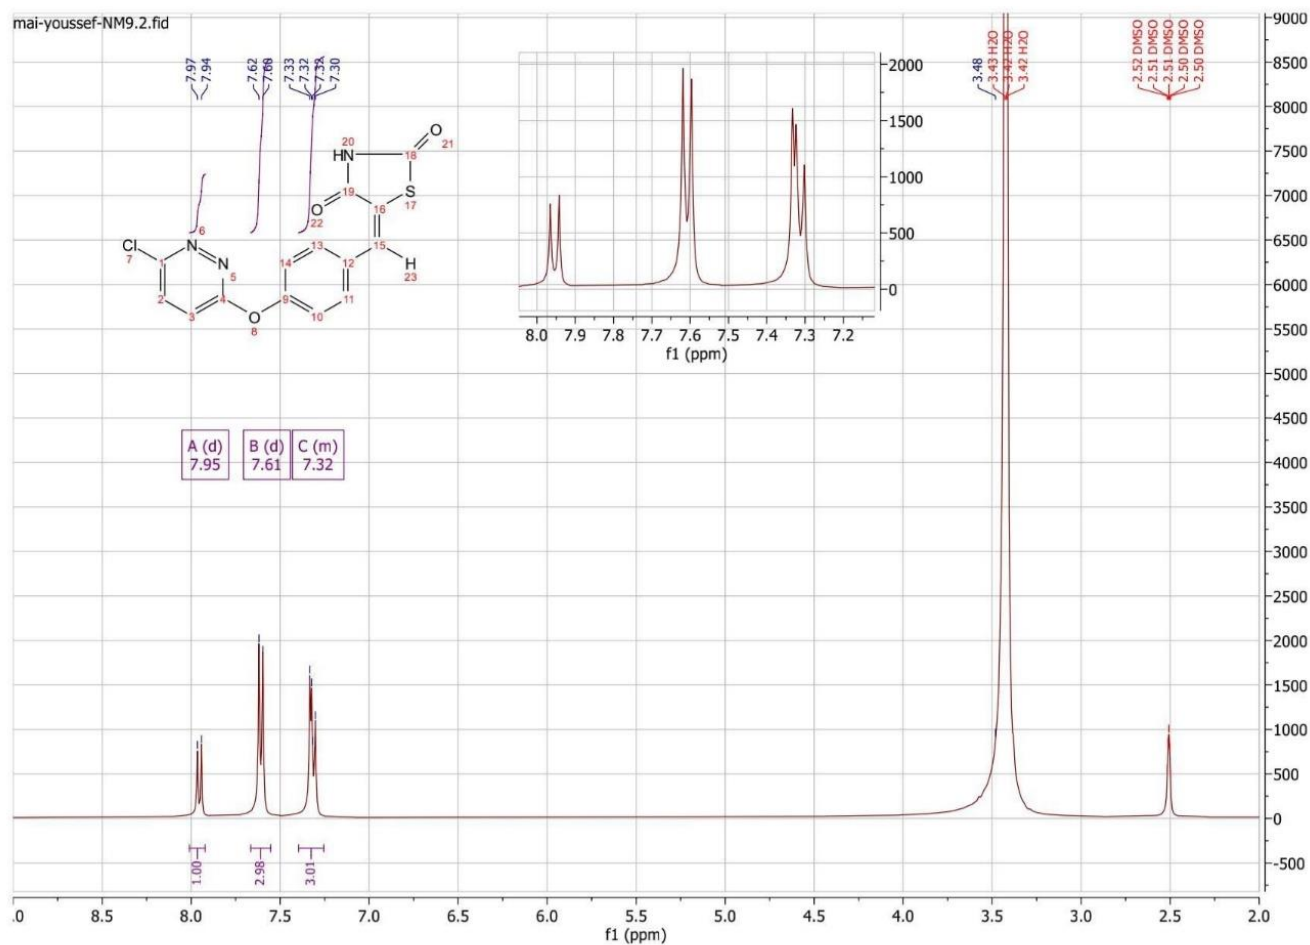

**Figure S41.**  $^1\text{H}$  NMR (400 MHz,  $\text{DMSO}-d_6$ ) spectrum of compound **5**.



# Supplementary Data

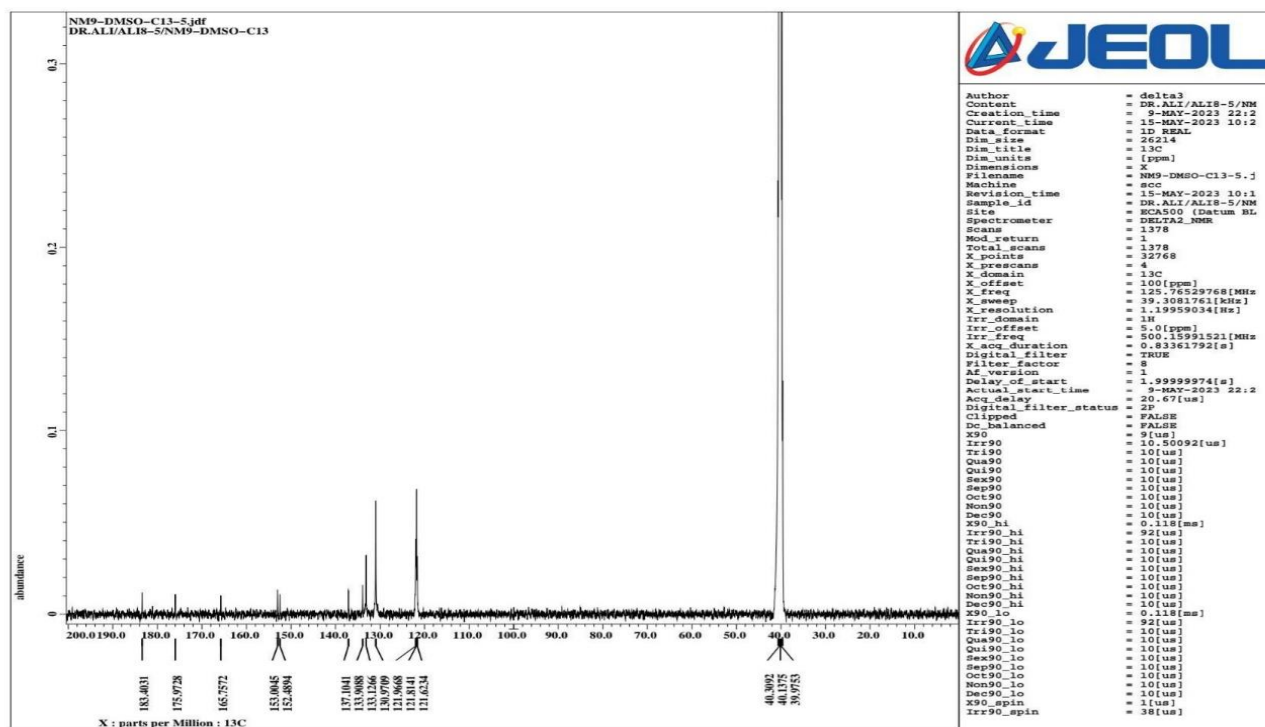

**Figure S42.**  $^{13}\text{C}$  NMR (100 MHz,  $\text{DMSO}-d_6$ ) spectrum of compound **5**.

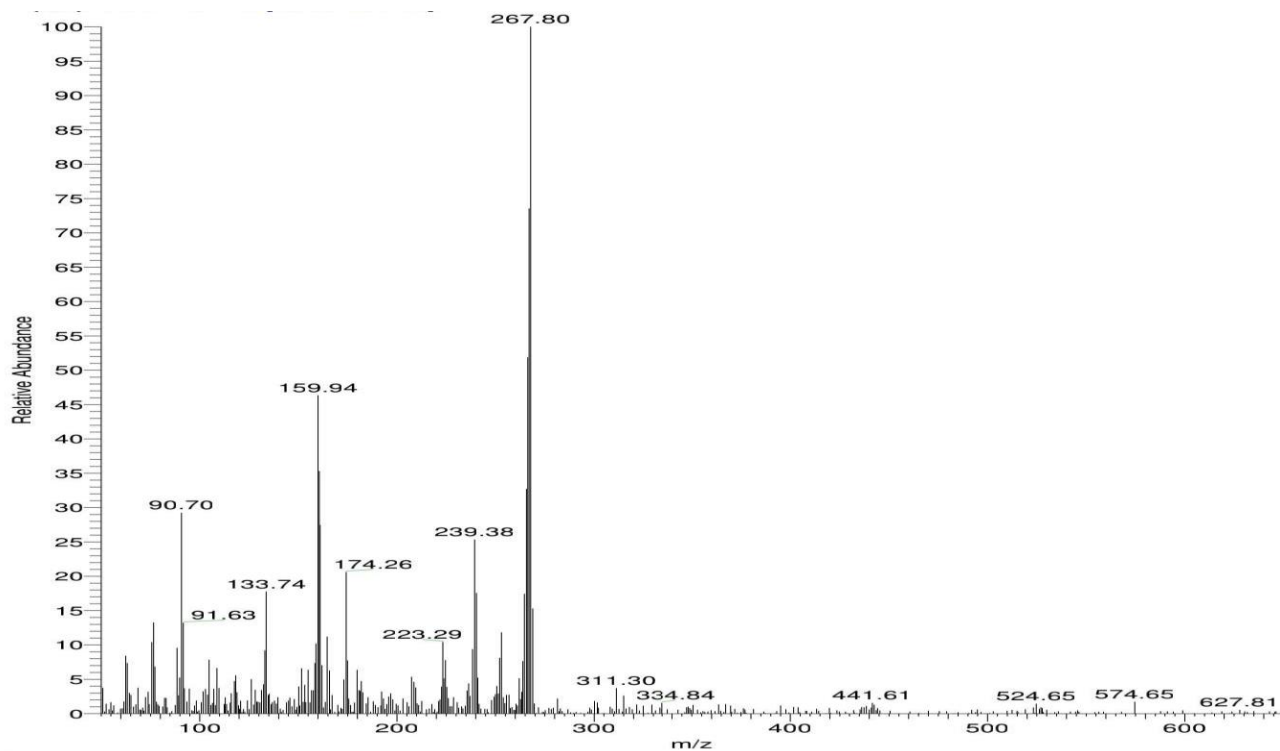

**Figure S43.** Mass spectrum of compound **5**.

# Biological Data

A

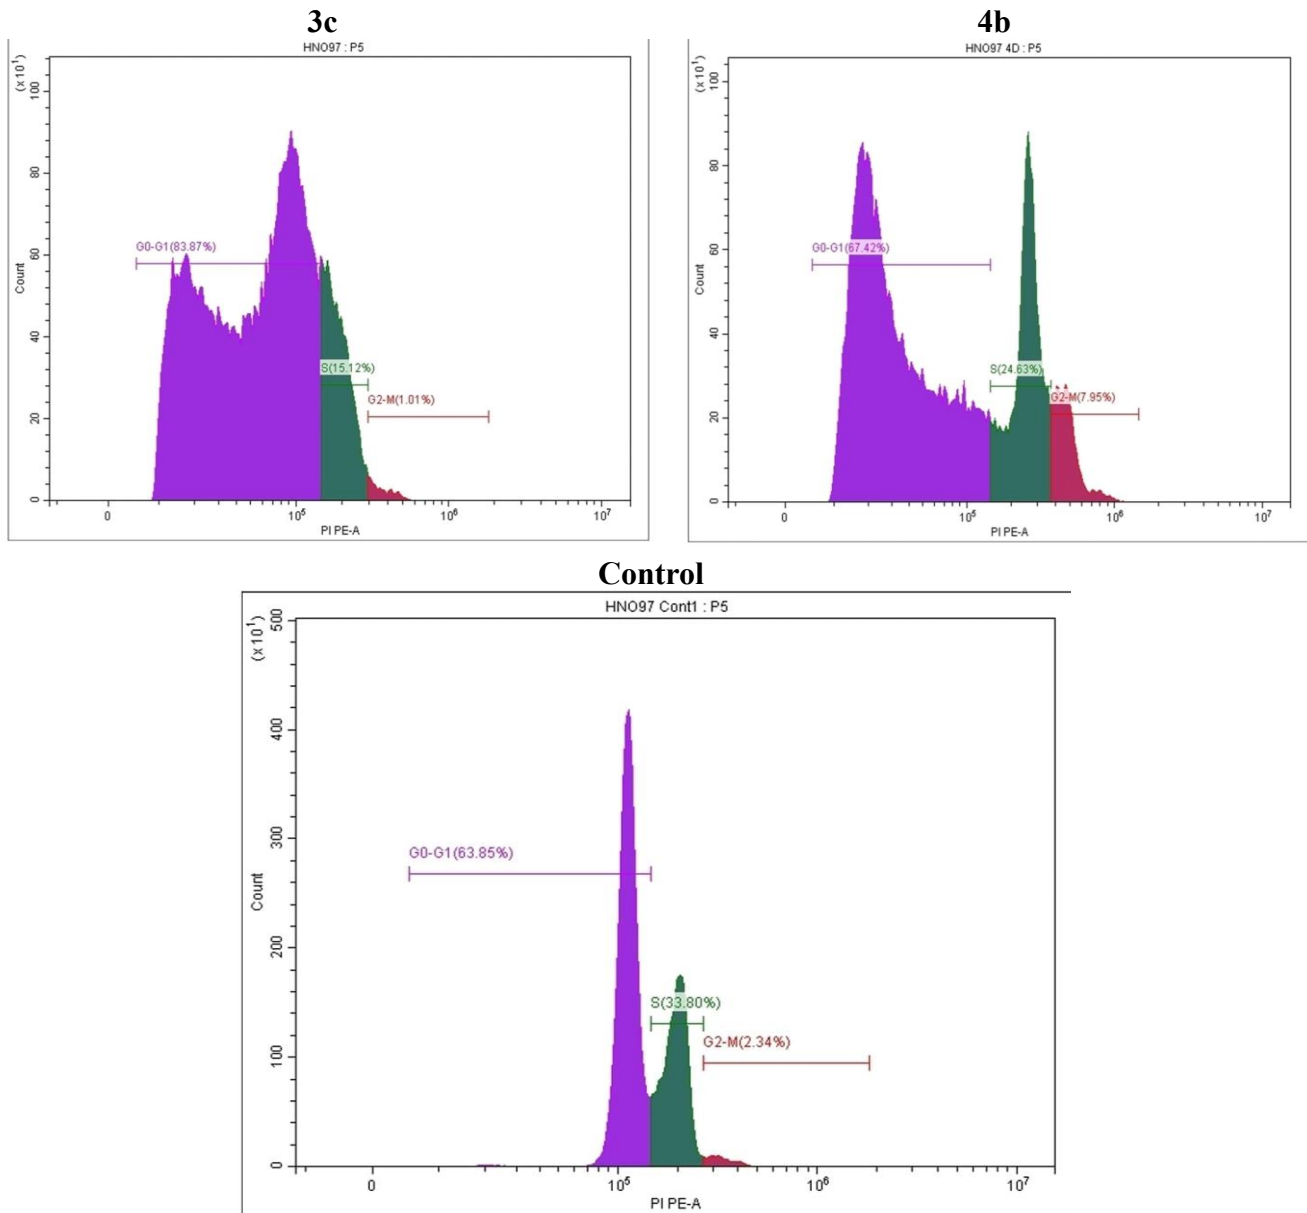

**Figure S44.** Repeated cell cycle analysis histograms of control, **3c**, and **4b** candidates in HNO97 cells.

# Supplementary Data

**Table S2.** IC<sub>50</sub> curves of the new 4-chloropyridazinoxypyphenyl hybrids (**3a-h**, **4a-e**, and **5**) against HNO97, FaDu, and MDA-MB-468 tested cells.

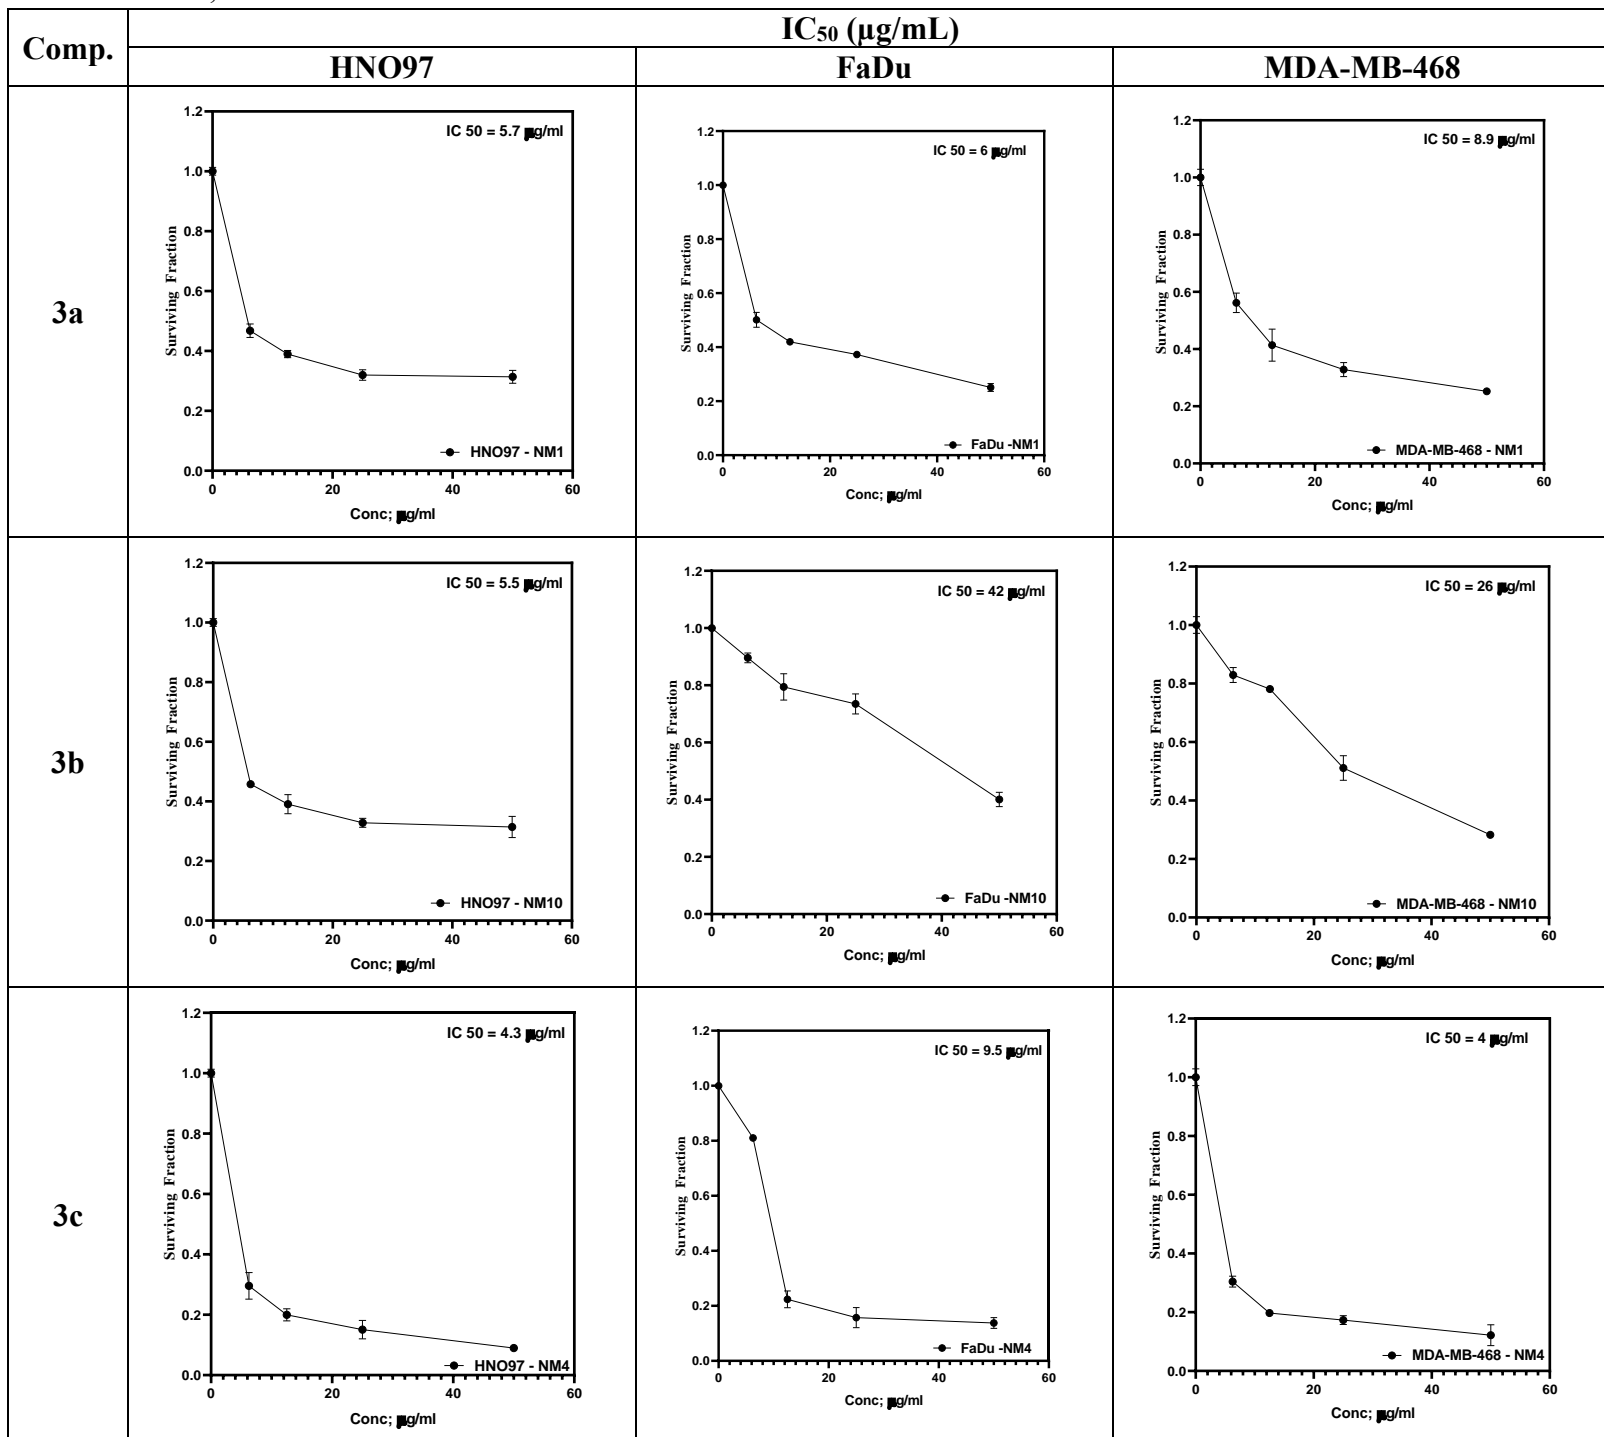

# Supplementary Data

3d

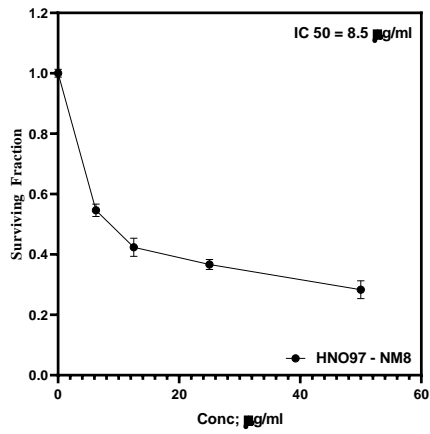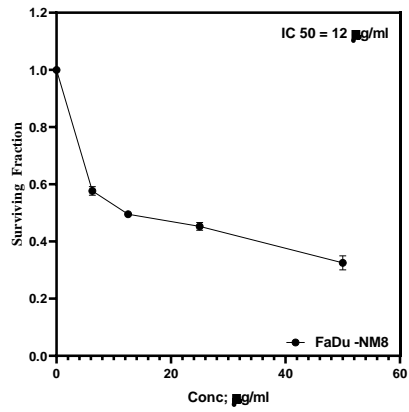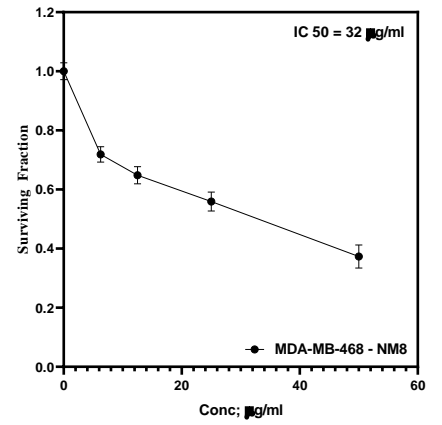

3e

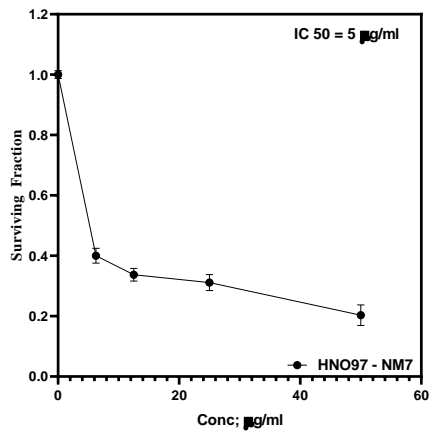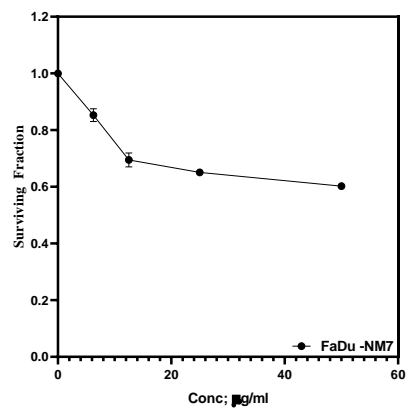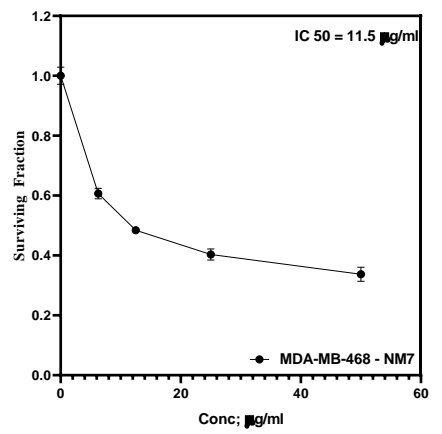

3f

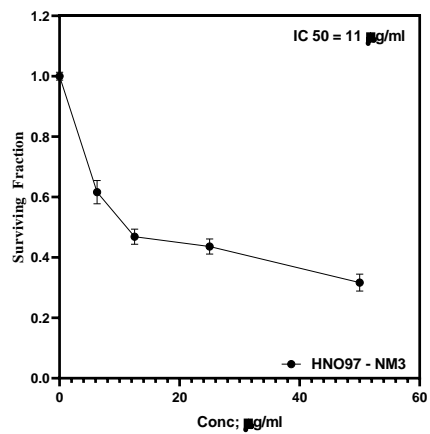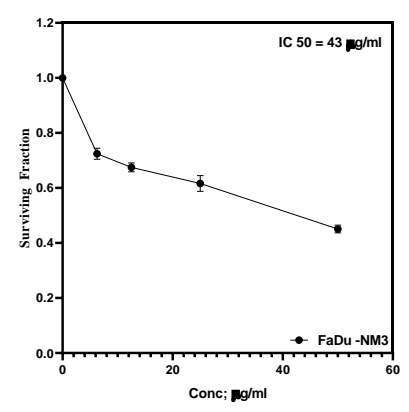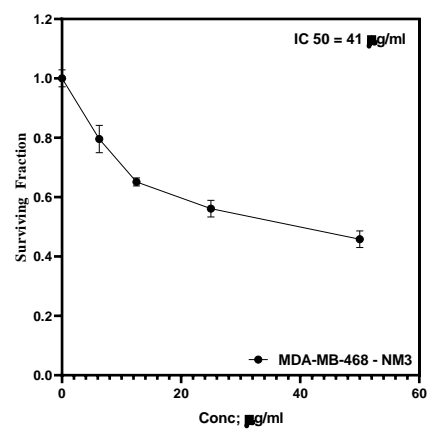

# Supplementary Data

3g

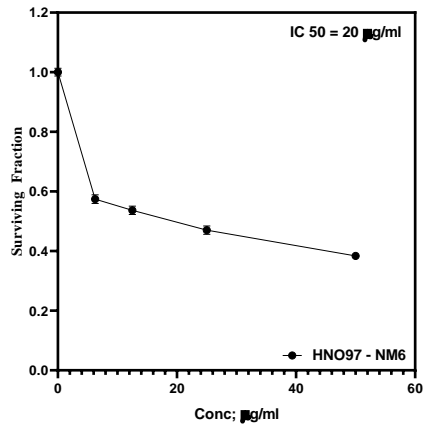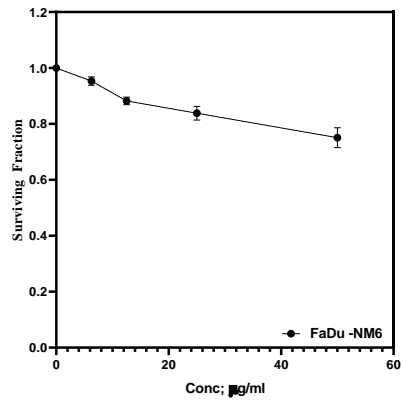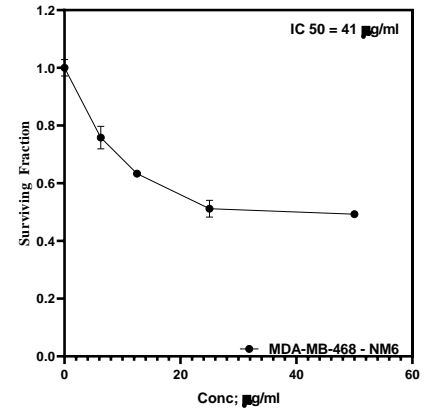

3h

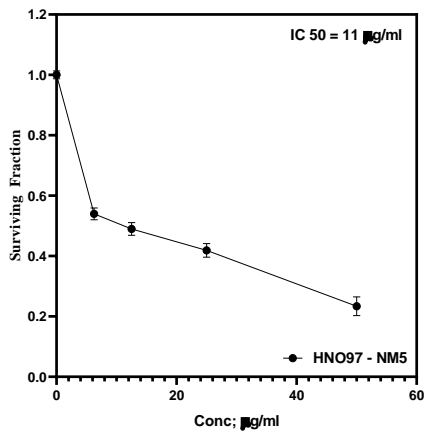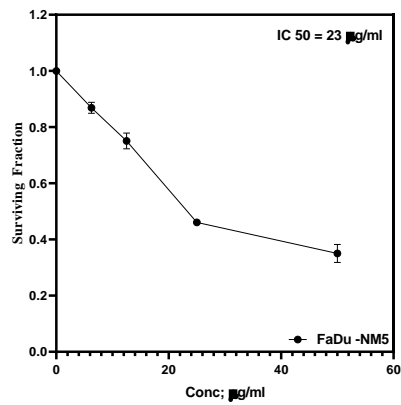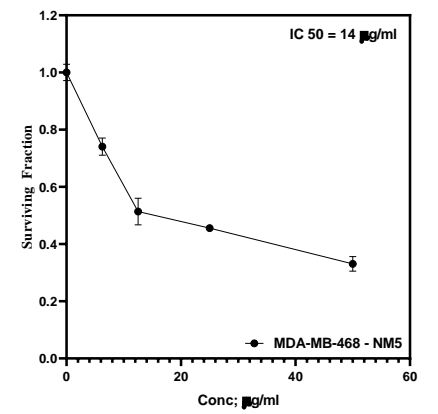

4a

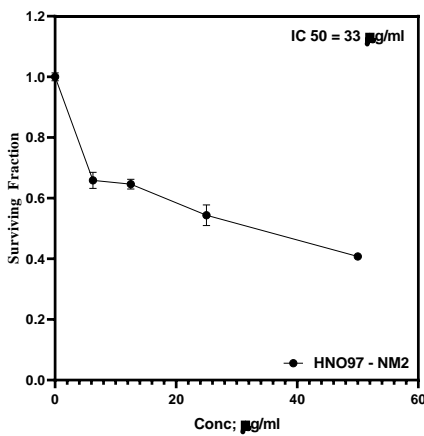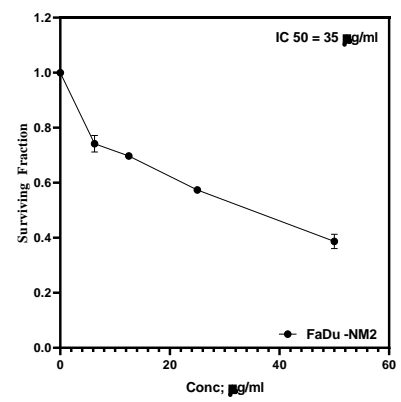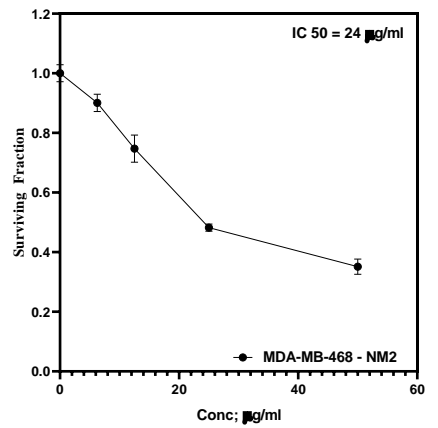

# Supplementary Data

4b

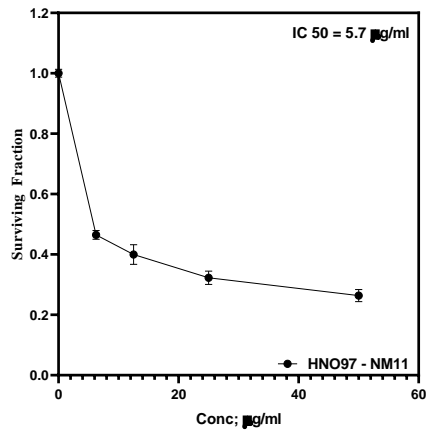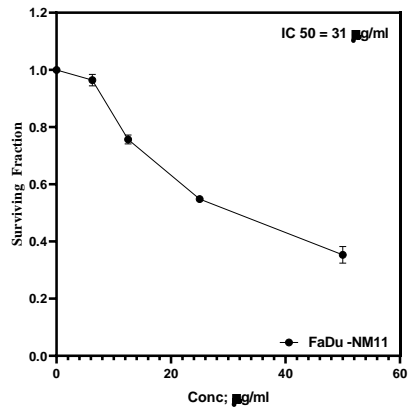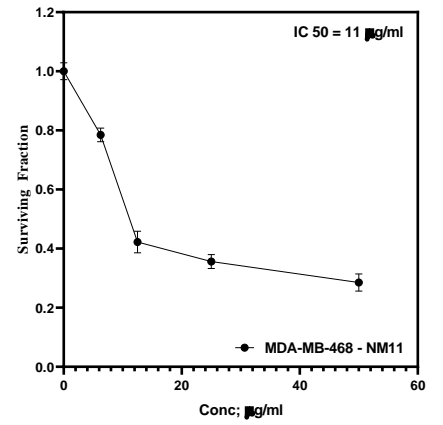

4c

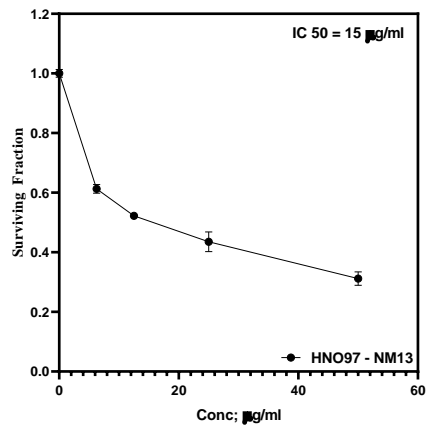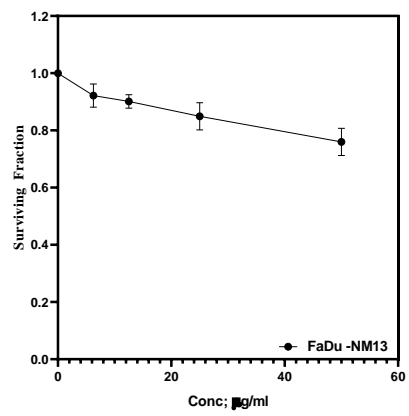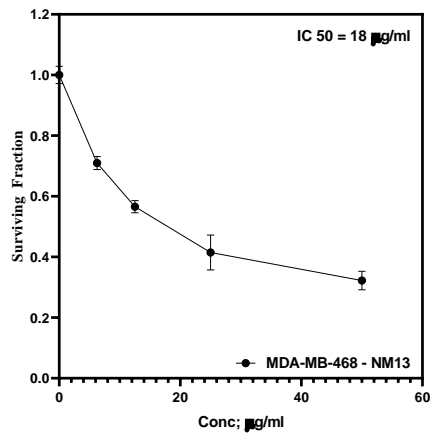

4d

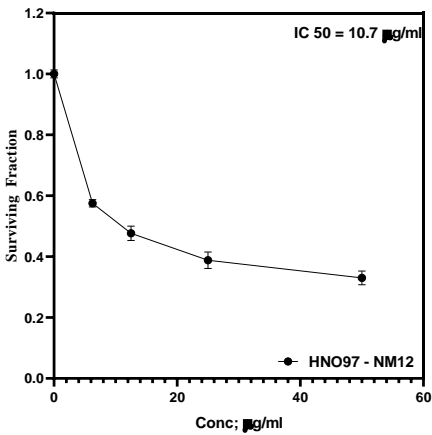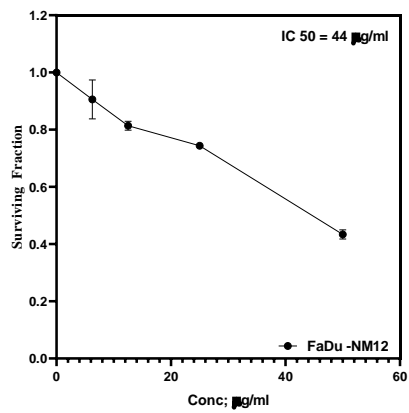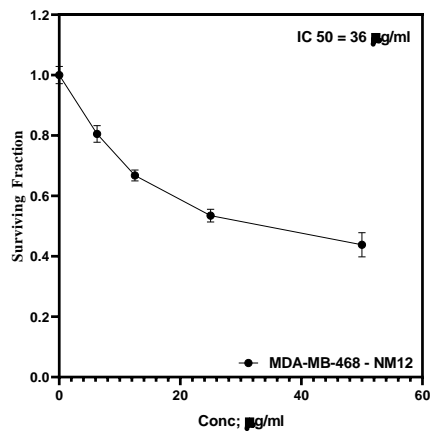

# Supplementary Data

4e

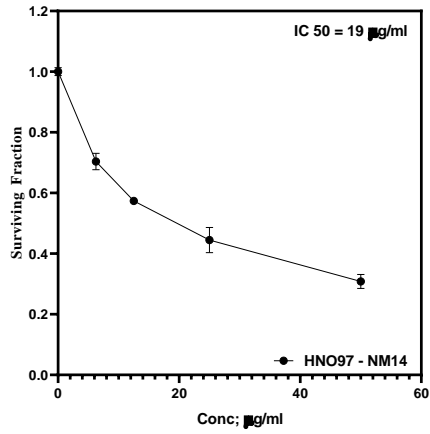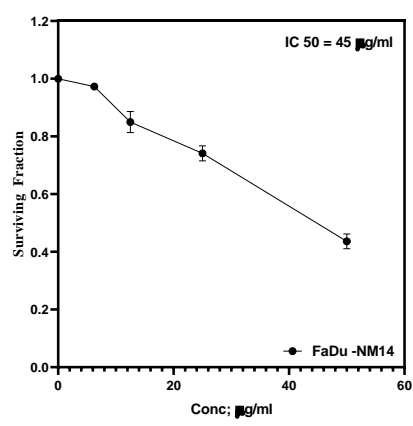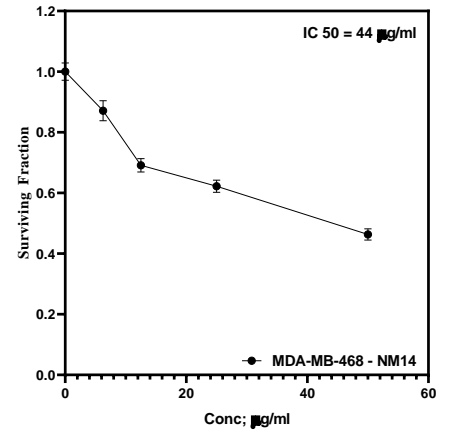

5

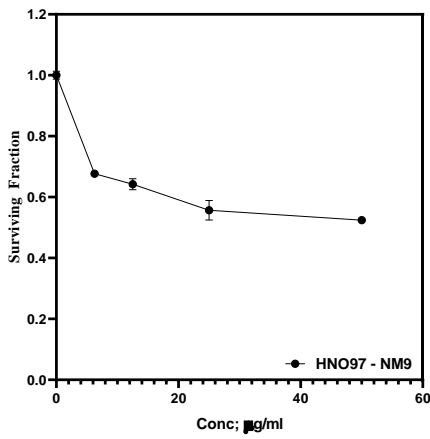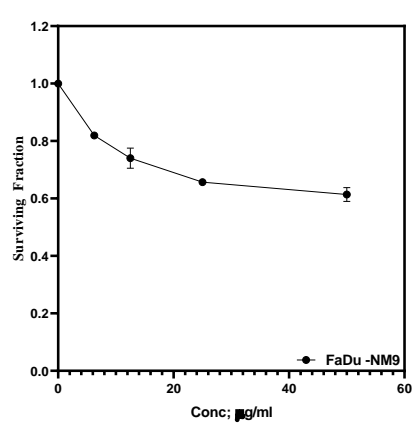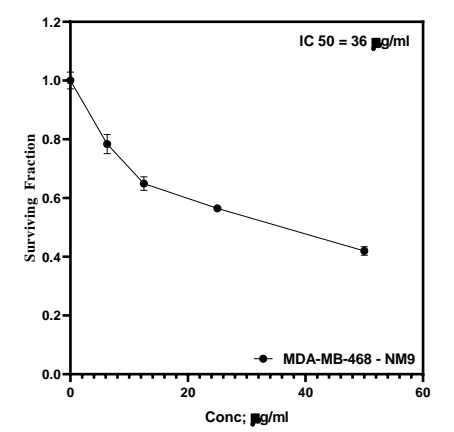

## Materials and Methods

### SI1. % Inhibition against human eleven cancer cell lines at 100 µg/mL

The antitumor activities of compounds (**3a-h**, **4a-e**, and **5**) against all tested cell lines were evaluated by sulphorhodamine-B (SRB) assay [1]. Briefly, cells were seeded at a density of  $3 \times 10^3$  cells/well in 96-well microtiter plates. They were left to attach for 24 h before incubation with the aforementioned compounds. Next, cells were treated with 100 µg/mL for **3a-h**, **4a-e**, and **5** candidates.

For each concentration, three wells were used and incubation was continued for 48 h. DMSO was used as a control vehicle (1 % v/v). At the end of incubation, cells were fixed with 20% trichloroacetic acid, and stained with 0.4% SRB dye. The optical density (O.D.) of each well was measured spectrophotometrically at 570 nm using an ELISA microplate reader (TECAN sunrise™, Germany). The mean survival fraction at each drug concentration was calculated as follows: O.D. of the treated cells/O.D. of the control cells. The IC<sub>50</sub> (concentration that produces 50% of cell growth inhibition) value of each drug was calculated using sigmoidal dose-response curve-fitting models (Graph Pad Prizm software, version 8).

### SI2. Cytotoxicity evaluation against HNO97, FaDu, and MDA-MB-468 cancer cell lines and normal HSF cell line

The antitumor activities of compounds (**3a-h**, **4a-e**, and **5**) against HNO97, FaDu, and MDA-MB-468 cells, besides the normal HSF cell line, were evaluated by sulphorhodamine-B (SRB) assay [1]. Briefly, cells were seeded at a density of  $3 \times 10^3$  cells/well in 96-well microtiter plates. They were left to attach for 24 h before incubation with the aforementioned compounds. Next, cells were treated with different concentrations of 62.5, 12.5, 25, and 50 µg/mL for **3a-h**, **4a-e**, and **5** candidates.

For each concentration, three wells were used and incubation was continued for 48 h. DMSO was used as a control vehicle (1 % v/v). At the end of incubation, cells were fixed with 20% trichloroacetic acid, and stained with 0.4% SRB dye. The optical density (O.D.) of each well was measured spectrophotometrically at 570 nm using an ELISA microplate reader (TECAN sunrise™, Germany). The mean survival fraction at each drug concentration was calculated as follows: O.D. of the treated cells/O.D. of the control cells. The IC<sub>50</sub> (concentration that produces 50% of cell growth inhibition) value of each drug was calculated using sigmoidal dose-response curve-fitting models (Graph Pad Prizm software, version 8).



### **SI3. Apoptotic markers assay (Enzyme-linked Immunosorbent assay)**

The microplate provided in this kit has been pre-coated with an antibody specific to p53, BAX, caspase 3, caspase 6, BCL-2, and CK 18. Standards or samples are then added to the appropriate microplate wells with a biotin-conjugated antibody specific to p53, BAX, caspase 3, caspase 6, BCL-2, and CK 18. Next, Avidin conjugated to Horseradish Peroxidase (HRP) is added to each microplate well and incubated. After the TMB substrate solution is added, only those wells that contain p53, BAX, caspase 3, caspase 6, BCL-2, and CK 18, biotin-conjugated antibody, and enzyme-conjugated Avidin will exhibit a color change. The enzyme-substrate reaction is terminated by the addition of sulphuric acid solution and the color change is measured spectrophotometrically at a wavelength of  $450\text{ nm} \pm 10\text{ nm}$ . The concentration of p53, BAX, caspase 3, caspase 6, BCL-2, and CK 18 in the samples is then determined by comparing the O.D. of the samples to the standard curve.

Average the duplicate readings for each standard, control, and sample, and subtract the average zero standard optical density. Construct a standard curve by plotting the mean O.D. and concentration for each standard and draw a best-fit curve through the points on the graph or create a standard curve on log-log graph paper with p53, BAX, caspase 3, caspase 6, BCL-2, and CK 18 concentration on the y-axis and absorbance on the x-axis. Using some plot software, for instance, Curve Expert 1.30, is also recommended. If samples have been diluted, the concentration read from the standard curve must be multiplied by the dilution factor.

#### ***Procedure***

1. Determine wells for diluted standard, blank, and sample. Prepare 7 wells for standard, 1 well for blank. Add 100  $\mu\text{L}$  each of dilutions of standard (read Reagent Preparation), blank, and samples into the appropriate wells. Cover with the Plate sealer. Incubate for 1 h at  $37\text{ }^{\circ}\text{C}$ .
2. Remove the liquid from each well, don't wash.
3. Add 100  $\mu\text{L}$  of Detection Reagent A working solution to each well, cover the wells with the plate sealer, and incubate for 1 h at  $37\text{ }^{\circ}\text{C}$ .
4. Aspirate the solution and wash with 350  $\mu\text{L}$  of  $1\times$  Wash Solution to each well using a squirt bottle, multi-channel pipette, manifold dispenser, or autowasher, and let it sit for 1~2 min. Remove the remaining liquid from all wells completely by snapping the plate onto absorbent paper. Totally wash 3 times. After

## Supplementary Data

the last wash, remove any remaining Wash Buffer by aspirating or decanting. Invert the plate and blot it against absorbent paper.

5. Add 100  $\mu$ L of Detection Reagent B working solution to each well, cover the wells with the plate sealer, and incubate for 30 min at 37 °C.

6. Repeat the aspiration/wash process for a total of 5 times as conducted in step 4.

7. Add 90  $\mu$ L of Substrate Solution to each well. Cover with a new Plate sealer. Incubate for 10-20 min at 37 °C (Don't exceed 30 min). Protect from light. The liquid will turn blue with the addition of a Substrate Solution.

8. Add 50 $\mu$ L of Stop Solution to each well. The liquid will turn yellow with the addition of the Stop solution. Mix the liquid by tapping the side of the plate. If the color change does not appear uniform, gently tap the plate to ensure thorough mixing.

9. Remove any drop of water and fingerprint on the bottom of the plate and confirm there is no bubble on the surface of the liquid. Then, run the microplate reader and conduct measurement at 450 nm immediately.

### SI4. Western blot assays

Western blots were carried out as described previously [2]. In brief, cells were grown under the specific condition with the tested drug in 6 well plate, after the desired incubation period, the growth medium was removed from the cells, then rinse cells in PBS, and remove the PBS. 100 $\mu$ l 1X SR reagent into a culture dish and scrape the attached cells, then transfer them to a microtube. Measure protein concentration using a BCA kit, prepare the sample by adding loading buffer and heating at 95°C for 5 min. Cell lysates (30  $\mu$ g) were separated by SDS-polyacrylamide gel electrophoresis, transferred onto a polyvinylidene difluoride membrane 12.5% or 15%, and then exposed to the appropriate antibodies.

Primary antibodies for Anti-PARP1 antibody [EPR18461] (ab191217), cleaved caspase-3 from Cell Signaling Technology Inc. (Beverly, MA, USA), Bax monoclonal antibody from Santa Cruz Biotechnology (Santa Cruz, CA, USA), anti-alpha tubulin antibody from Sigma (Saint-Quentin-Fallavier, France), Anti-phospho-Histone H2A.X (Ser139) Antibody, clone JBW301 were used at 1:1000, Horseradish peroxidase-conjugated anti-rabbit, or anti-mouse secondary antibodies were purchased from GE Healthcare (Amersham, UK) and used at 1:10,000. Proteins were visualized with the ECL system (Amersham, UK). Membranes were developed using Odyssey Fc Imager (LI-COR, U.S.). The western blot assays were representative of at least three independent experiments.

### SI5. Cell cycle analysis

Human head and neck squamous cell carcinoma (HNO97) cells were grown in six-well plates (each one contains  $2 \times 10^5$  cells per well) containing 10% fetal bovine serum and incubated for 24 h at 37 °C and 5% CO<sub>2</sub>. The medium was replaced with (DMSO 1% v/v) containing the 3.1 μM of each compound (**3c** or **4b**), then incubated for 48 h, collected, and washed with cold phosphate-buffered saline (PBS). After fixation of the collected cells with ice-cold absolute ethanol (70%), the cells were rinsed with PBS then stained with the DNA fluorochrome PI, and kept for 15 min at 37 °C. Then samples were analyzed with a FACS Caliber flow cytometer.

### References

- [1] P. Skehan, R. Storeng, D. Scudiero, A. Monks, J. McMahon, D. Vistica, J.T. Warren, H. Bokesch, S. Kenney, M.R. Boyd, New colorimetric cytotoxicity assay for anticancer-drug screening, *JNCI: Journal of the National Cancer Institute* 82(13) (1990) 1107-1112.
- [2] B.T. Kurien, R.H. Scofield, Western blotting, *Methods* 38(4) (2006) 283-293.
